# Supplementary material for: Asymmetric transfer hydrogenation of γ-aryl α,γ-dioxo-butyric acid esters
Source: Royal Society of Chemistry journal article supplement (doi:10.1039/c6ra02500e), 2016-01-01
Supplement: c6ra02500e1.pdf [file c6ra02500e1.pdf]

Electronic Supplementary Material (ESI) for RSC Advances.

This journal is © The Royal Society of Chemistry 2016

### Supplementary Information

## Asymmetric Transfer Hydrogenation of $\gamma$ -aryl $\alpha$ , $\gamma$ -dioxo-butyric acid esters†

Yuan-Zhao Mo, Hui-Fang Nie, Yang Lei, Dong-Xu Zhang, Xiao-Ye Li, Sheng-Yong Zhang\* and Qiao-Feng Wang\*

<sup>a</sup> Department of Medicinal Chemistry, School of Pharmacy, The Fourth Military Medical University, Changle West Road 169, Xi'an, 710032, P. R. China. E-mail: zytwqf@fmmu.edu.cn; syzhang@fmmu.edu.cn; Fax: +86-29-84776945; Tel: +86-29-84776807 ext. 611

\*Corresponding author's E-mails: zytwqf@fmmu.edu.cn; syzhang@fmmu.edu.cn

|                                                                                                                             |         |
|-----------------------------------------------------------------------------------------------------------------------------|---------|
| 1. <sup>1</sup> H NMR, <sup>13</sup> C NMR and <sup>31</sup> P NMR Spectra of <b>L</b> <sub>1</sub> - <b>L</b> <sub>6</sub> | S2-S9   |
| 2. HRMS of <b>L</b> <sub>1</sub> - <b>L</b> <sub>6</sub>                                                                    | S10-S14 |
| 3. <sup>1</sup> H and <sup>13</sup> C NMR Spectra of <b>4a-4g</b>                                                           | S15-S21 |
| 4. HPLC charts of <b>4a-4g</b> [catalyst was RuCl( <i>p</i> -cymene)( Ts-DPEN)]                                             | S22-S30 |
| 5. HPLC charts of <b>4a-4g</b> [catalysts were ferrocene-based chiral ligands]                                              | S31-S37 |
| 6. Single crystal diffraction of <b>4b</b> and <b>4e</b>                                                                    | S38-S55 |

# 1. <sup>1</sup>H NMR, <sup>13</sup>C NMR and <sup>31</sup>P NMR Spectra of L<sub>1</sub>-L<sub>6</sub>

## <sup>1</sup>H NMR Spectra of L<sub>1</sub>

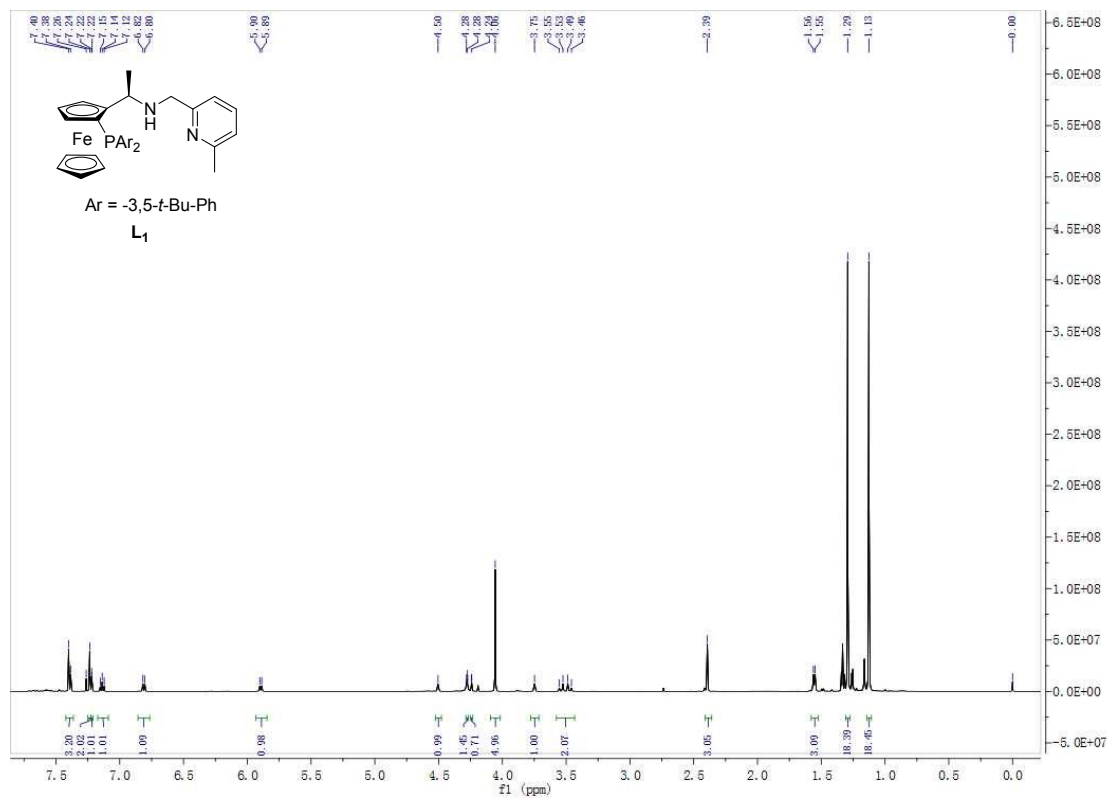

## <sup>31</sup>P NMR Spectra of L<sub>1</sub>

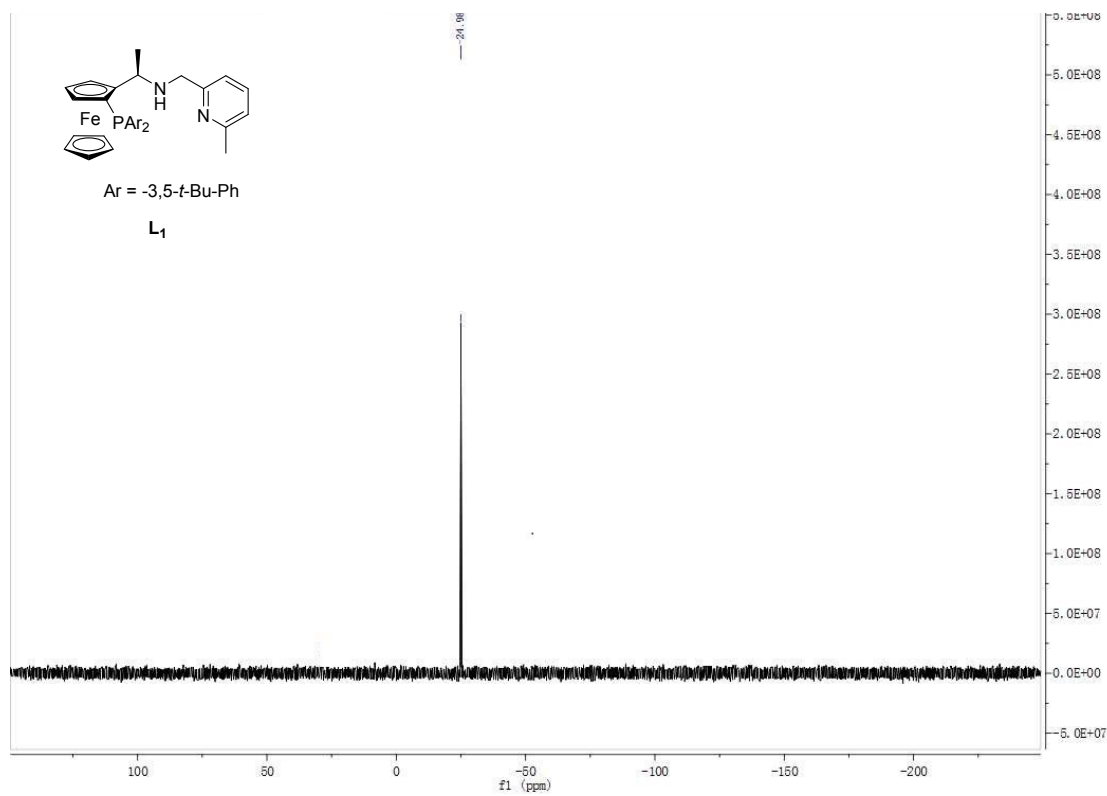

### <sup>13</sup>C NMR Spectra of L<sub>1</sub>

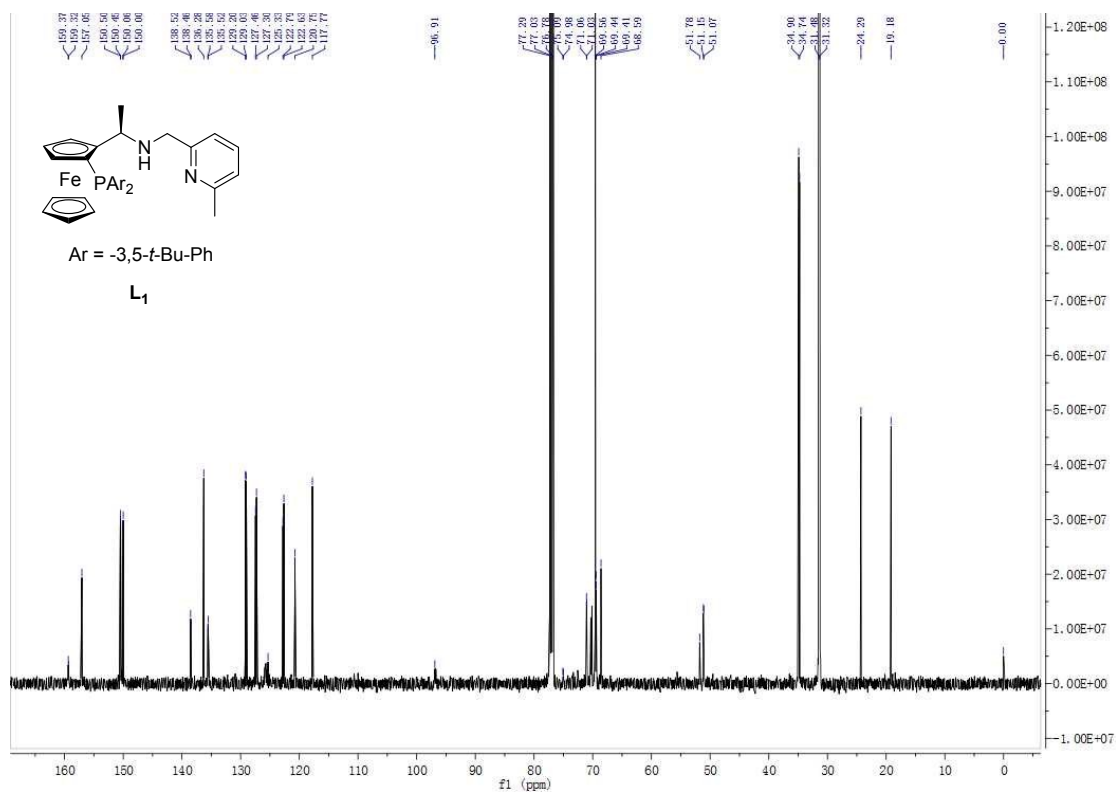

### <sup>1</sup>H NMR Spectra of L<sub>2</sub>

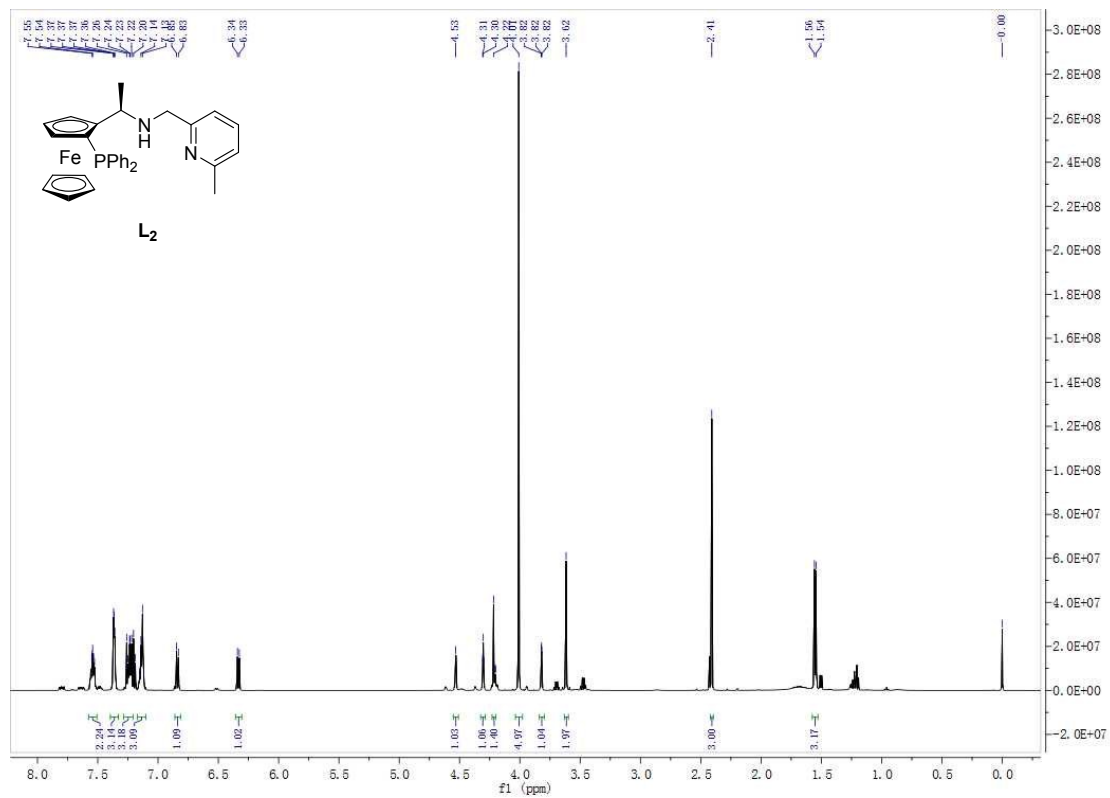

### <sup>31</sup>P NMR Spectra of L<sub>2</sub>

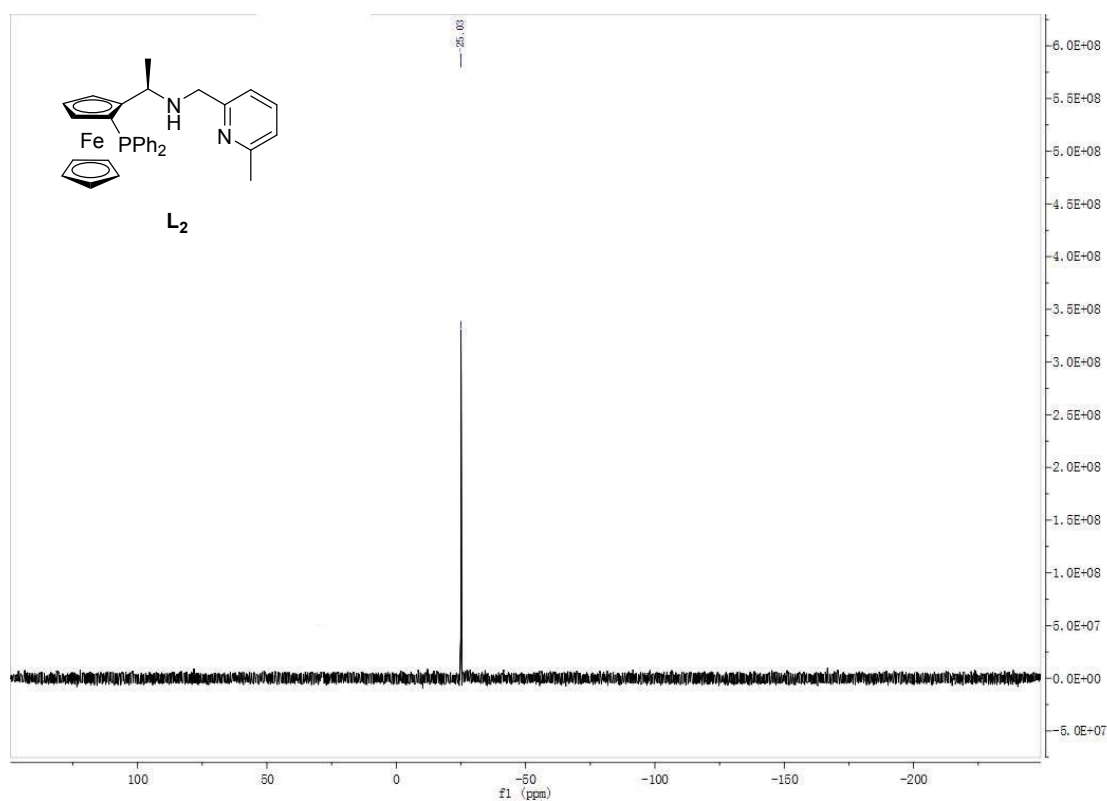

### <sup>13</sup>C NMR Spectra of L<sub>2</sub>

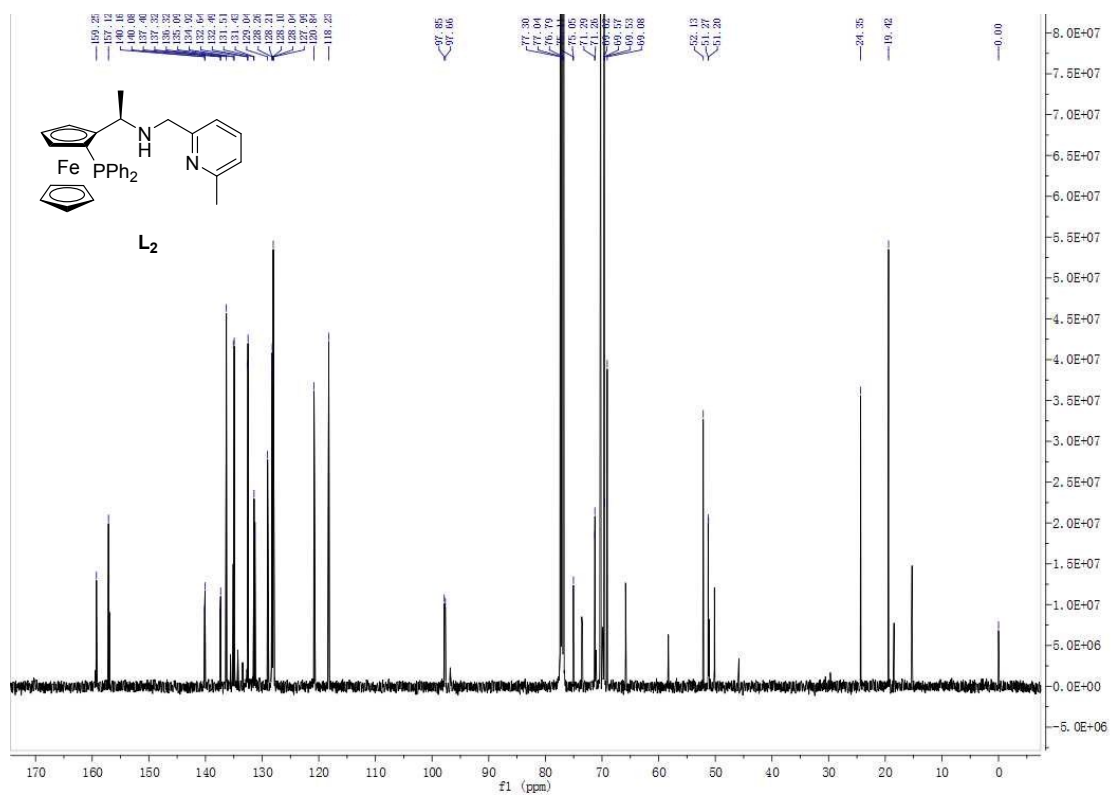

### <sup>1</sup>H NMR Spectra of L<sub>3</sub>

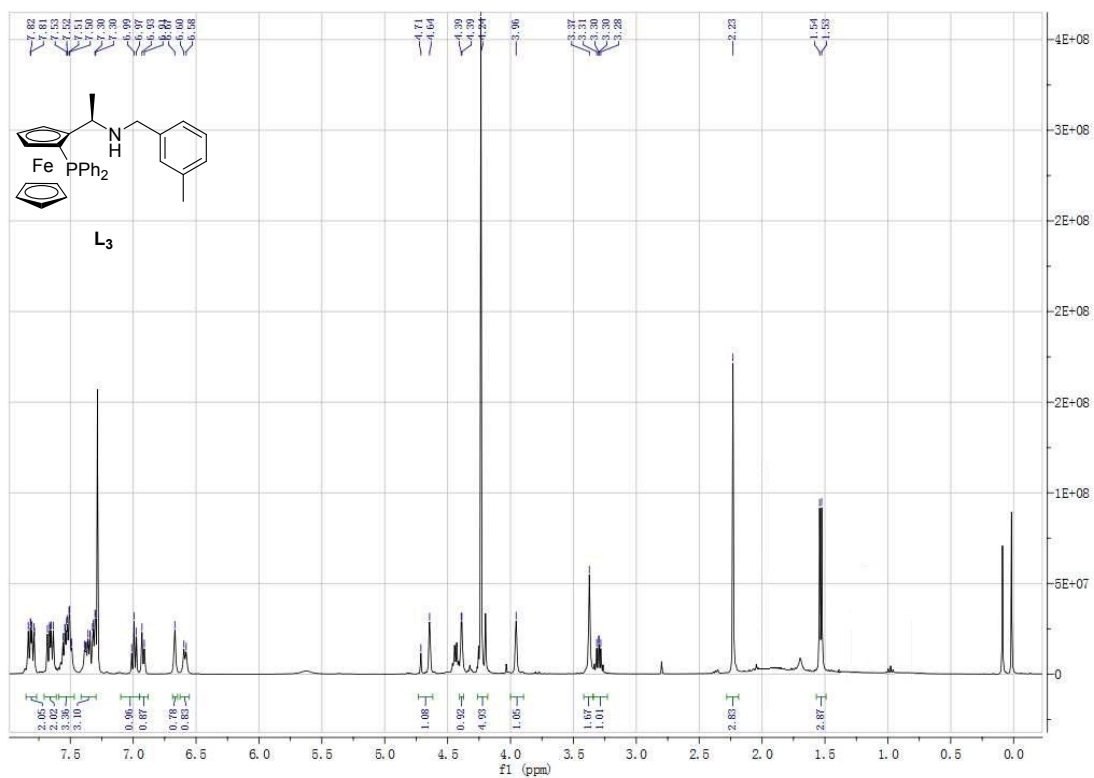

### <sup>31</sup>P NMR Spectra of L<sub>3</sub>

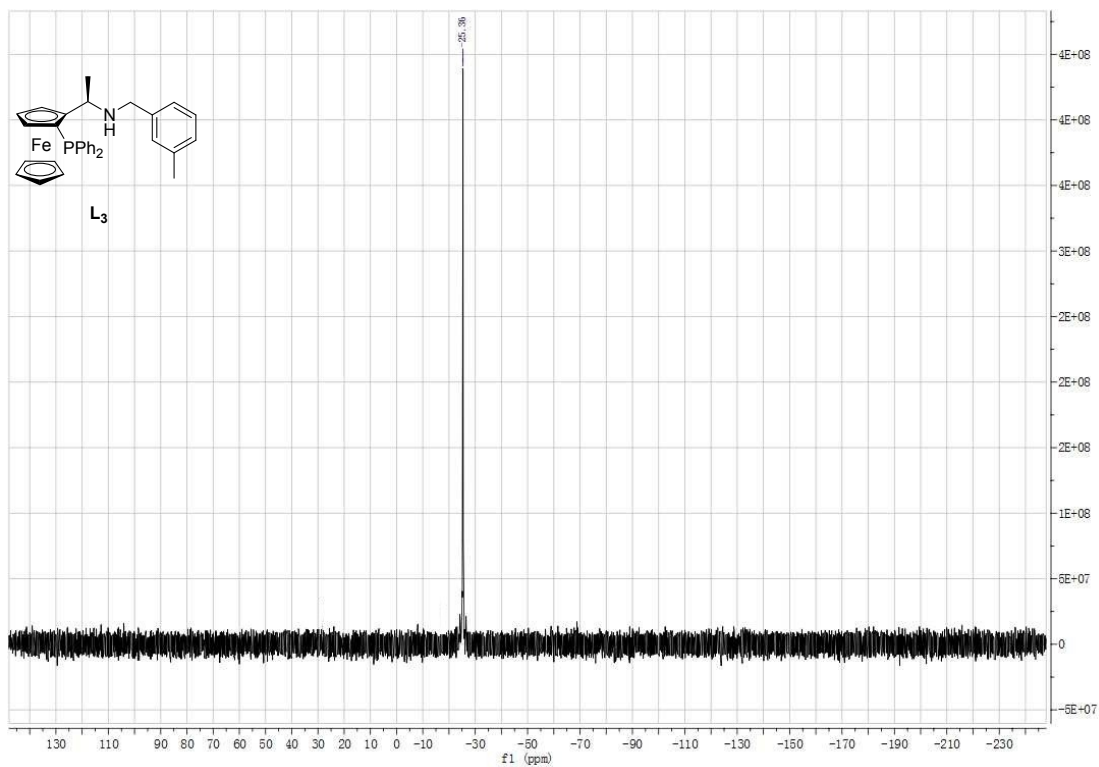

### $^{13}\text{C}$ NMR Spectra of $\text{L}_3$

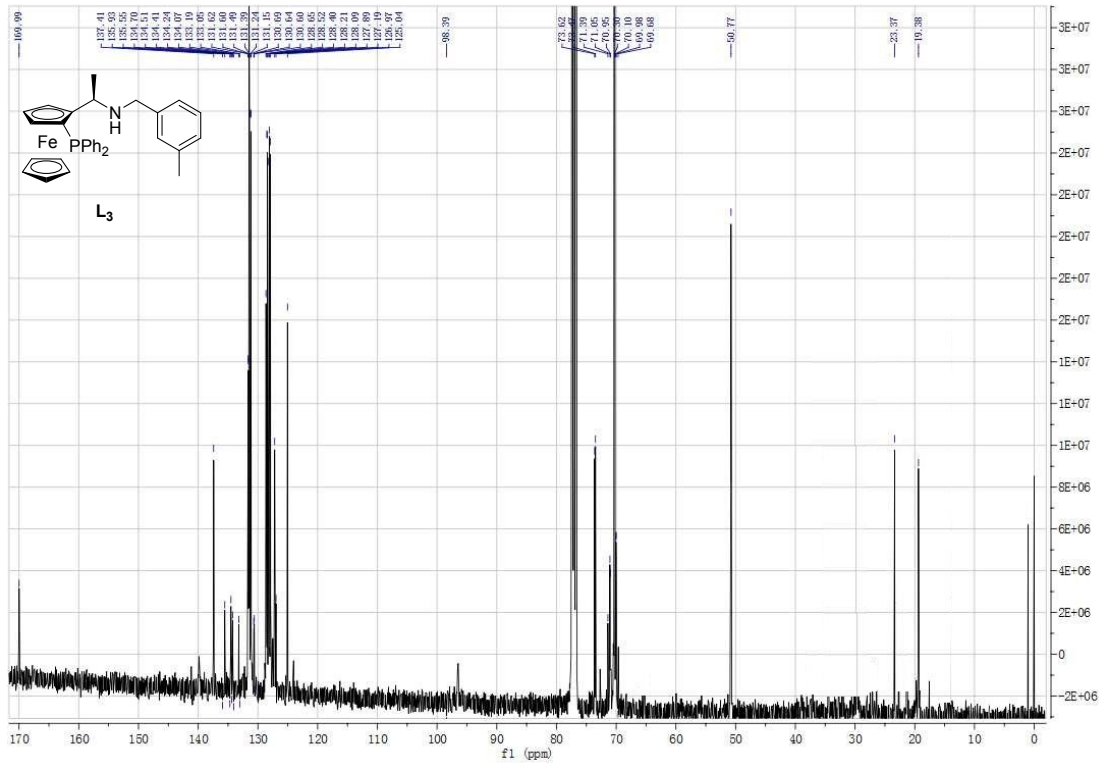

### $^1\text{H}$ NMR Spectra of $\text{L}_4$

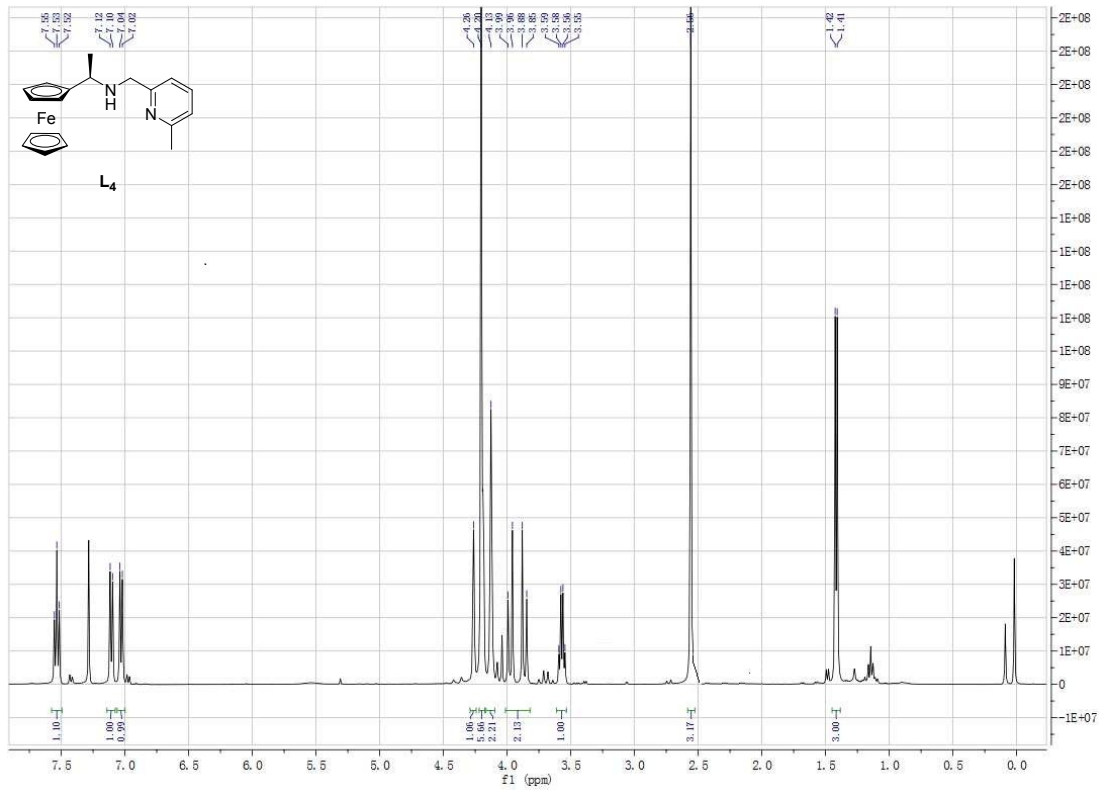

### $^{13}\text{C}$ NMR Spectra of $\text{L}_4$

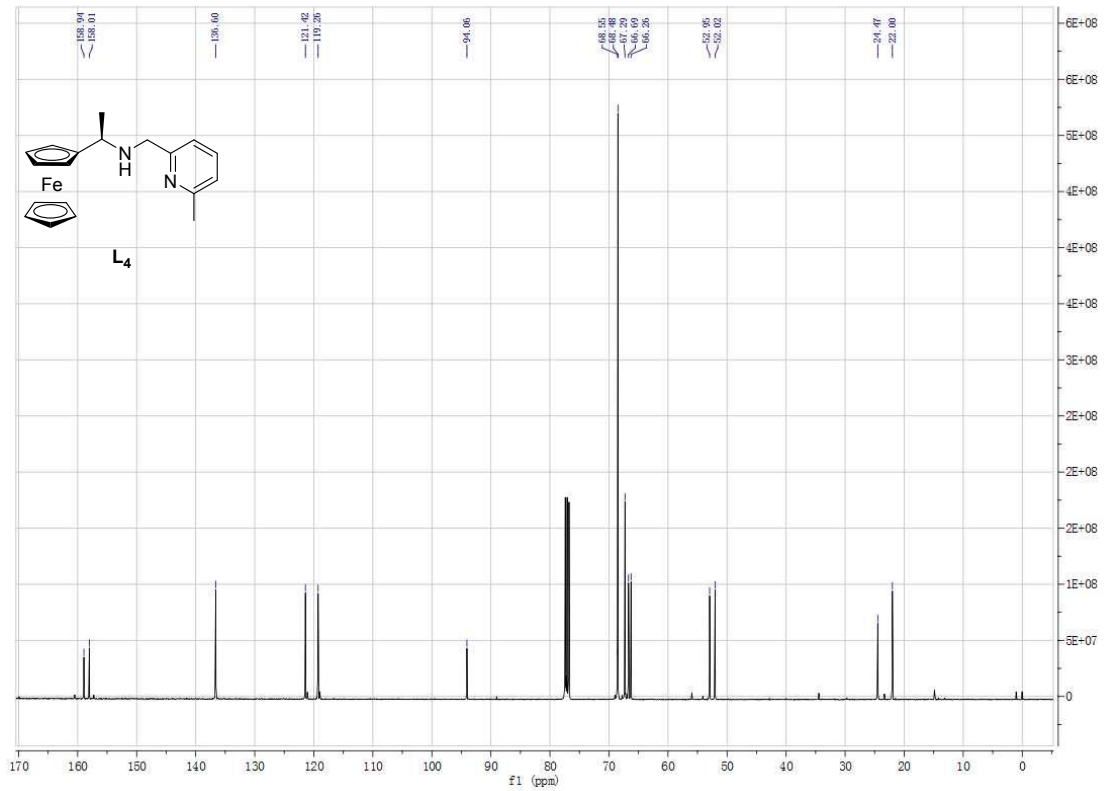

### $^1\text{H}$ NMR Spectra of $\text{L}_5$

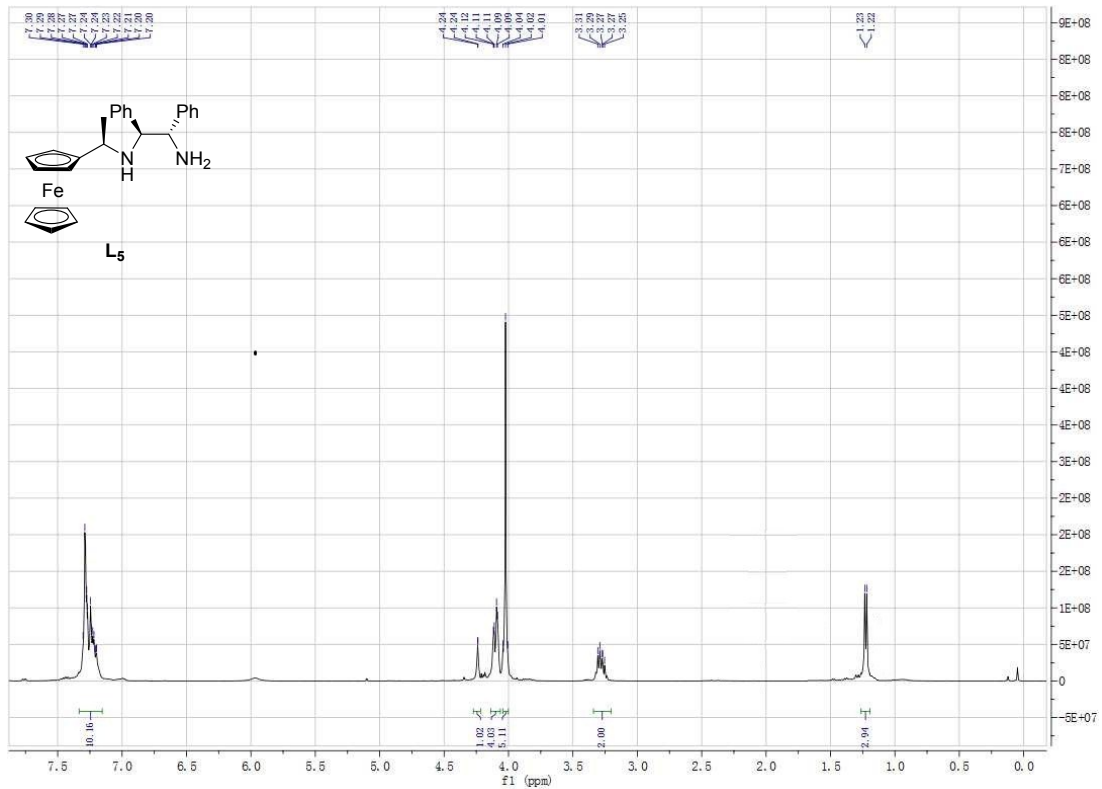

### $^{13}\text{C}$ NMR Spectra of $\text{L}_5$

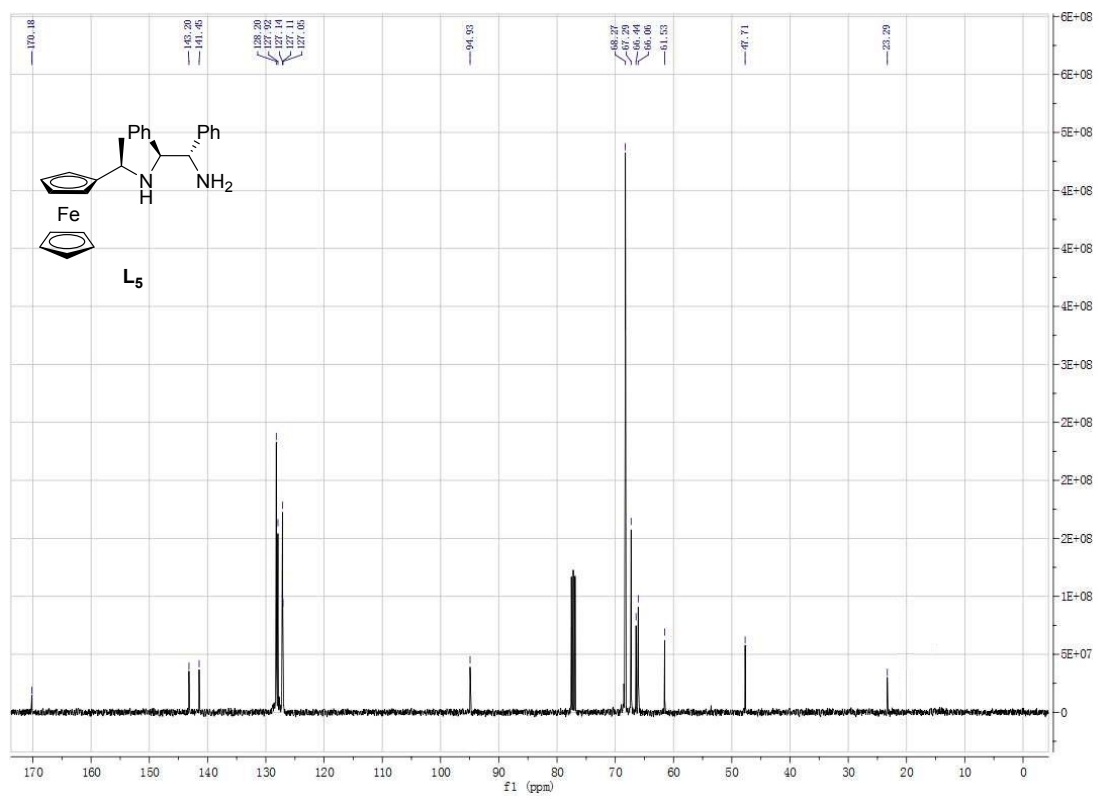

### $^1\text{H}$ NMR Spectra of $\text{L}_6$

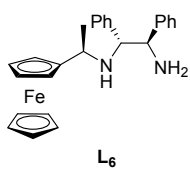



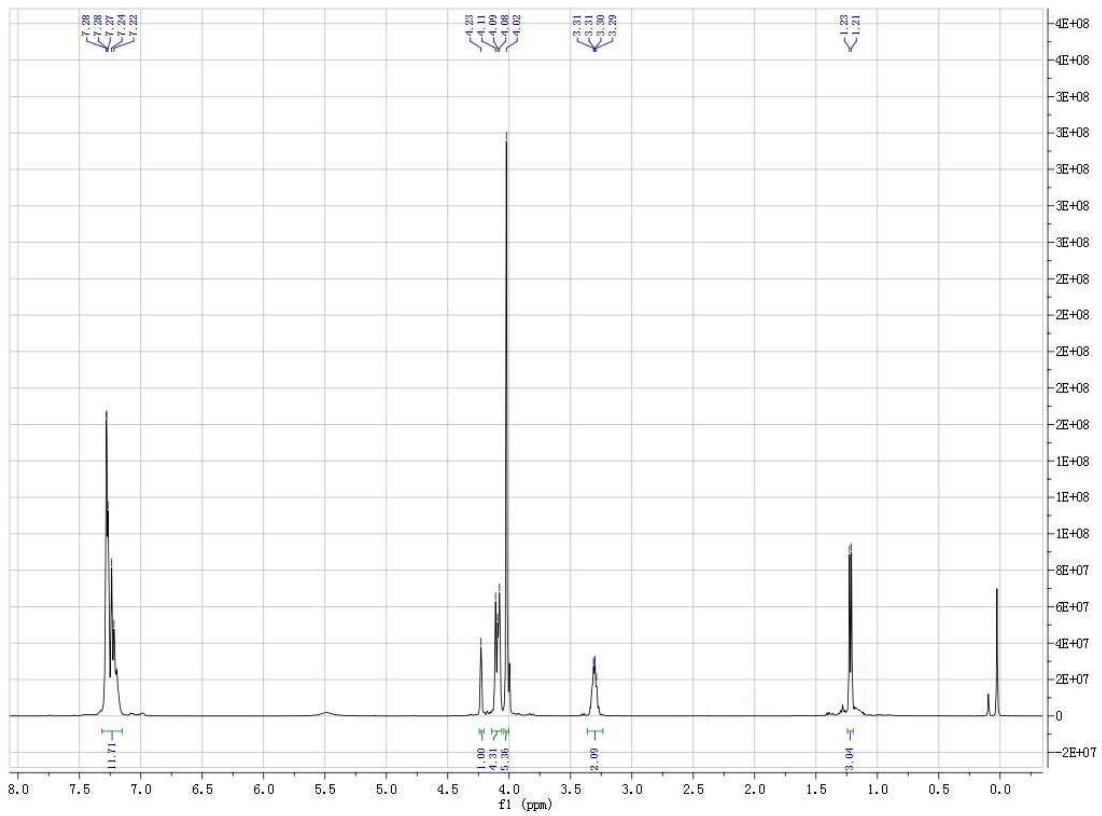

**<sup>13</sup>C NMR Spectra of L<sub>6</sub>**

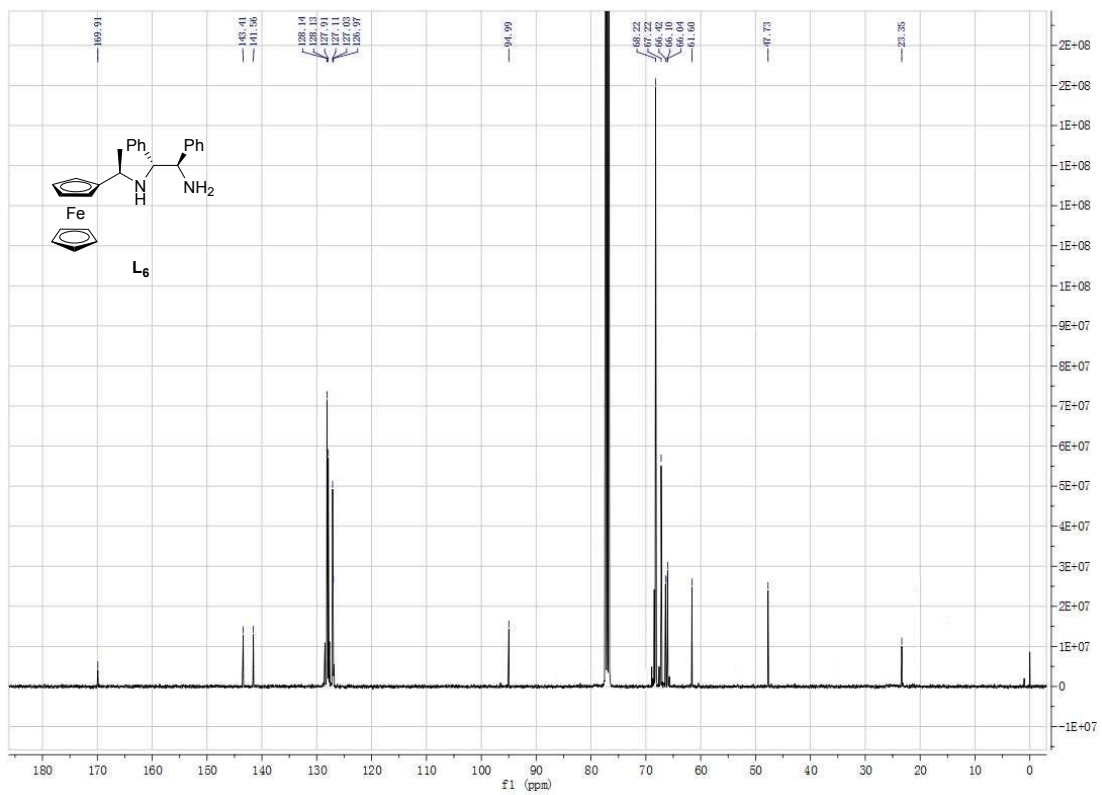

## 2.HRMS of L<sub>1</sub>-L<sub>6</sub>

### HRMS of L<sub>1</sub>

|               |            |             |           |                 |              |                        |                       |
|---------------|------------|-------------|-----------|-----------------|--------------|------------------------|-----------------------|
| Sample Name   | LC/MS      | Position    | P1-A3     | Instrument Name | Instrument 1 | User Name              |                       |
| Inj Vol       | 3          | InjPosition |           | SampleType      | Sample       | IRM Calibration Status | Some Ions Missed      |
| Data Filename | NHF2012C.d | ACQ Method  | chen-ms.m | Comment         |              | Acquired Time          | 10/15/2012 6:31:57 PM |

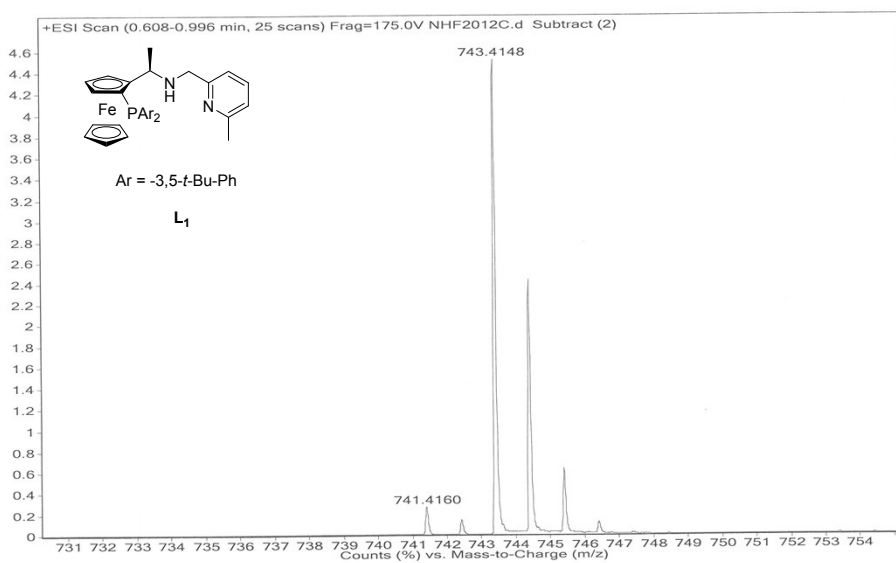

## HRMS of L<sub>2</sub>

|               |            |             |           |                 |              |                        |                       |
|---------------|------------|-------------|-----------|-----------------|--------------|------------------------|-----------------------|
| Sample Name   | LC/MS      | Position    | P1-A5     | Instrument Name | Instrument 1 | User Name              |                       |
| Inj Vol       | 3          | InjPosition |           | SampleType      | Sample       | IRM Calibration Status | Some Ions Missed      |
| Data Filename | NHF2012E.d | ACQ Method  | chen-ms.m | Comment         |              | Acquired Time          | 10/15/2012 6:39:34 PM |

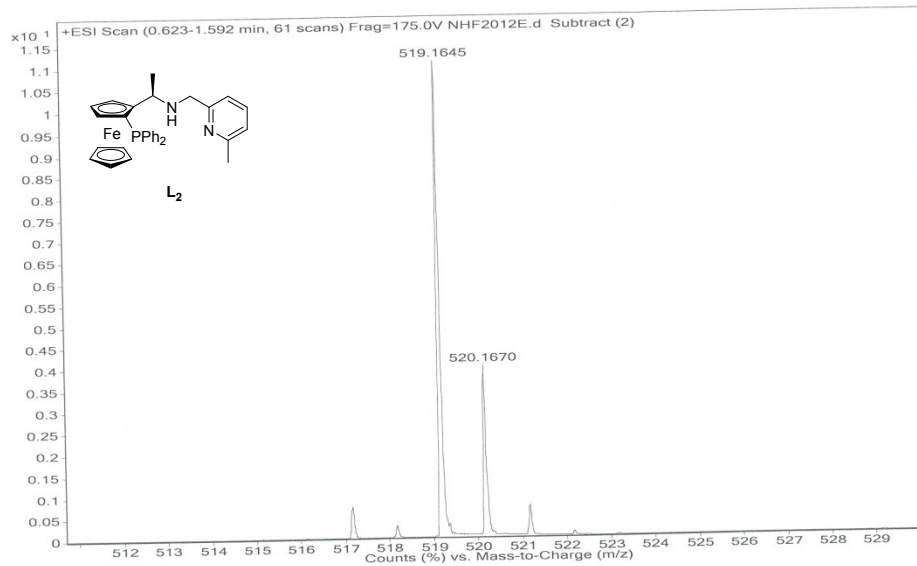

## HRMS of L<sub>3</sub>

S11

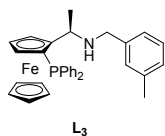

# Display Report

## Analysis Info

Analysis Name H:\siyida\_MYZ-P20.d  
Method tune\_low 50-500.m  
Sample Name  
Comment

Acquisition Date 2015-11-25 16:00:19  
Operator NWU  
Instrument micrOTOF-Q II 10280

## Acquisition Parameter

|             |            |                       |           |                  |           |
|-------------|------------|-----------------------|-----------|------------------|-----------|
| Source Type | ESI        | Ion Polarity          | Positive  | Set Nebulizer    | 0.4 Bar   |
| Focus       | Not active | Set Capillary         | 4500 V    | Set Dry Heater   | 180 °C    |
| Scan Begin  | 50 m/z     | Set End Plate Offset  | -500 V    | Set Dry Gas      | 4.0 l/min |
| Scan End    | 3000 m/z   | Set Collision Cell RF | 110.0 Vpp | Set Divert Valve | Source    |

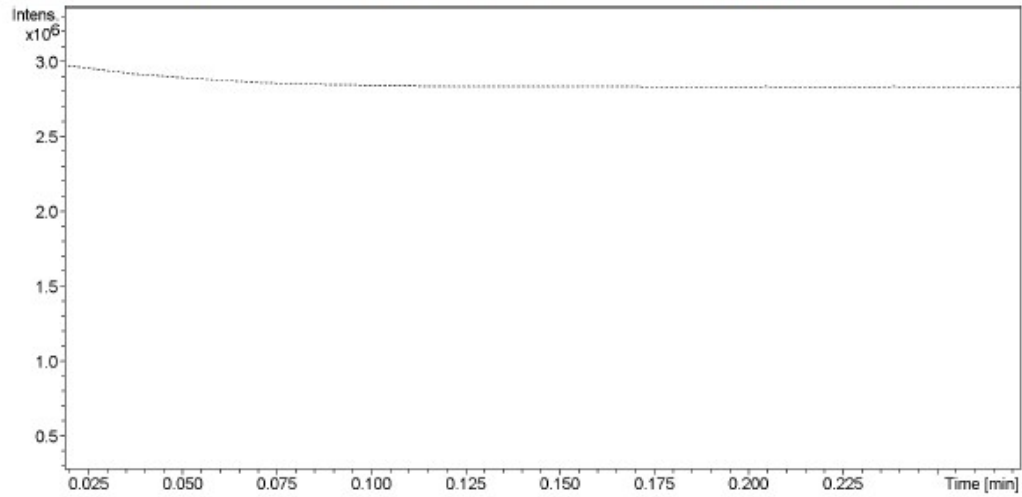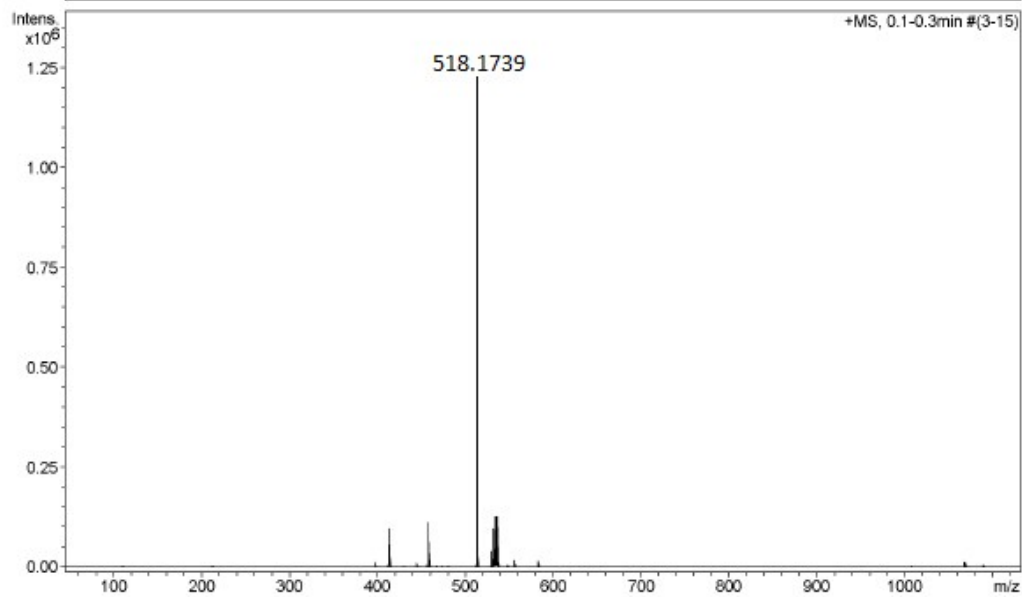

# HRMS of L<sub>4</sub>

## Display Report

### Analysis Info

Analysis Name H:\siyida\_he\_71.d  
 Method tune\_low 50-500.m  
 Sample Name  
 Comment

Acquisition Date 2015-9-25 15:30:55  
 Operator NWU  
 Instrument micrOTOF-Q II 10280

### Acquisition Parameter

|             |            |                       |           |                  |           |
|-------------|------------|-----------------------|-----------|------------------|-----------|
| Source Type | ESI        | Ion Polarity          | Positive  | Set Nebulizer    | 0.4 Bar   |
| Focus       | Not active | Set Capillary         | 4500 V    | Set Dry Heater   | 180 °C    |
| Scan Begin  | 50 m/z     | Set End Plate Offset  | -500 V    | Set Dry Gas      | 4.0 l/min |
| Scan End    | 3000 m/z   | Set Collision Cell RF | 110.0 Vpp | Set Divert Valve | Source    |

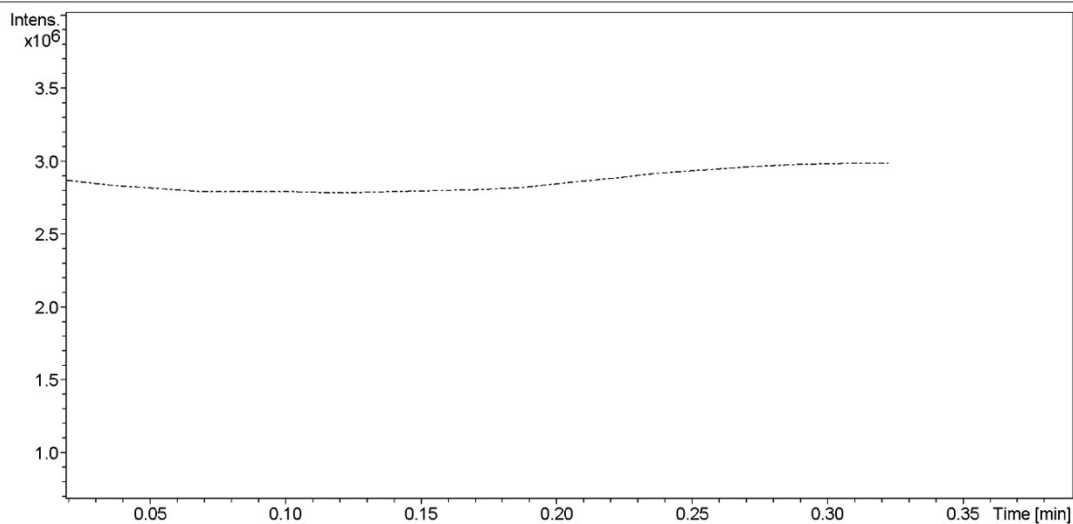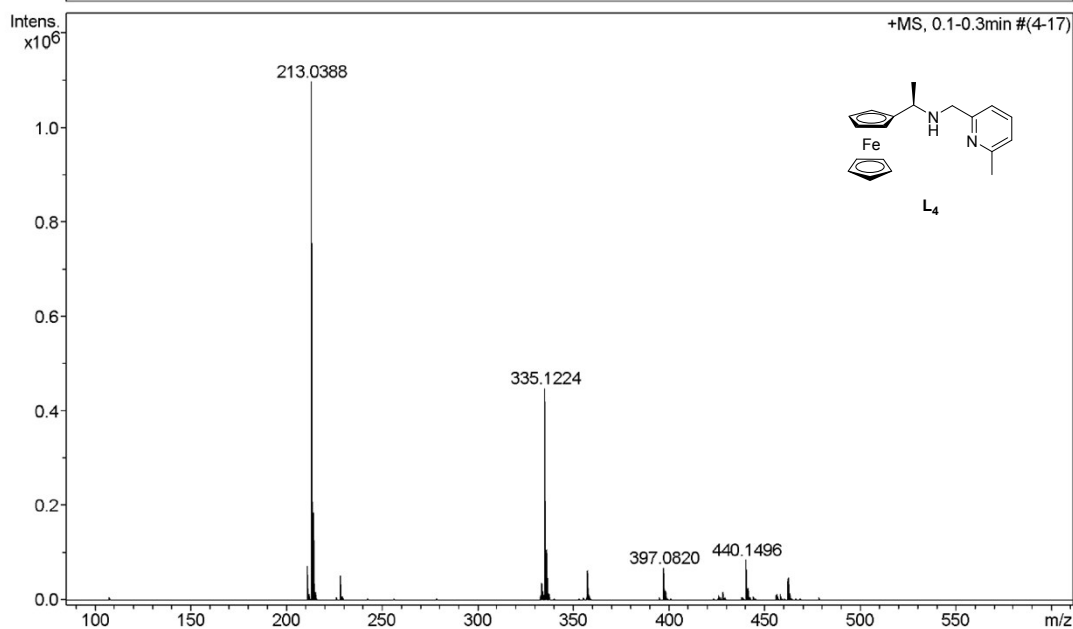

# HRMS of L<sub>5</sub>

## Display Report

### Analysis Info

Analysis Name D:\data1\siyida\_he\_10.d  
 Method tune\_low 50-500.m  
 Sample Name  
 Comment

Acquisition Date 2015-10-29 16:09:26  
 Operator NWU  
 Instrument micrOTOF-Q II 10280

### Acquisition Parameter

|             |            |                       |           |                  |           |
|-------------|------------|-----------------------|-----------|------------------|-----------|
| Source Type | ESI        | Ion Polarity          | Positive  | Set Nebulizer    | 0.4 Bar   |
| Focus       | Not active | Set Capillary         | 4500 V    | Set Dry Heater   | 180 °C    |
| Scan Begin  | 50 m/z     | Set End Plate Offset  | -500 V    | Set Dry Gas      | 4.0 l/min |
| Scan End    | 3000 m/z   | Set Collision Cell RF | 110.0 Vpp | Set Divert Valve | Source    |

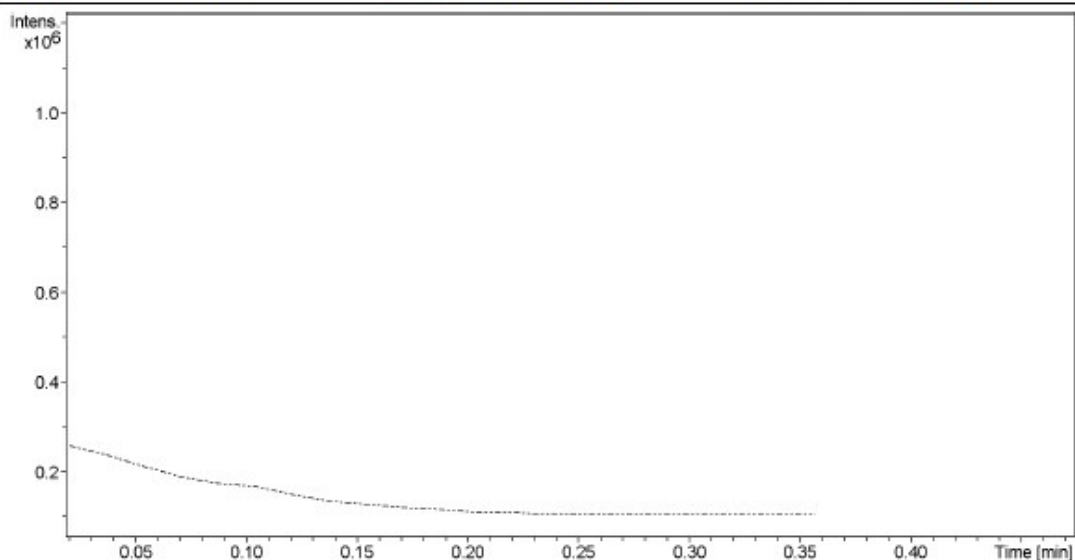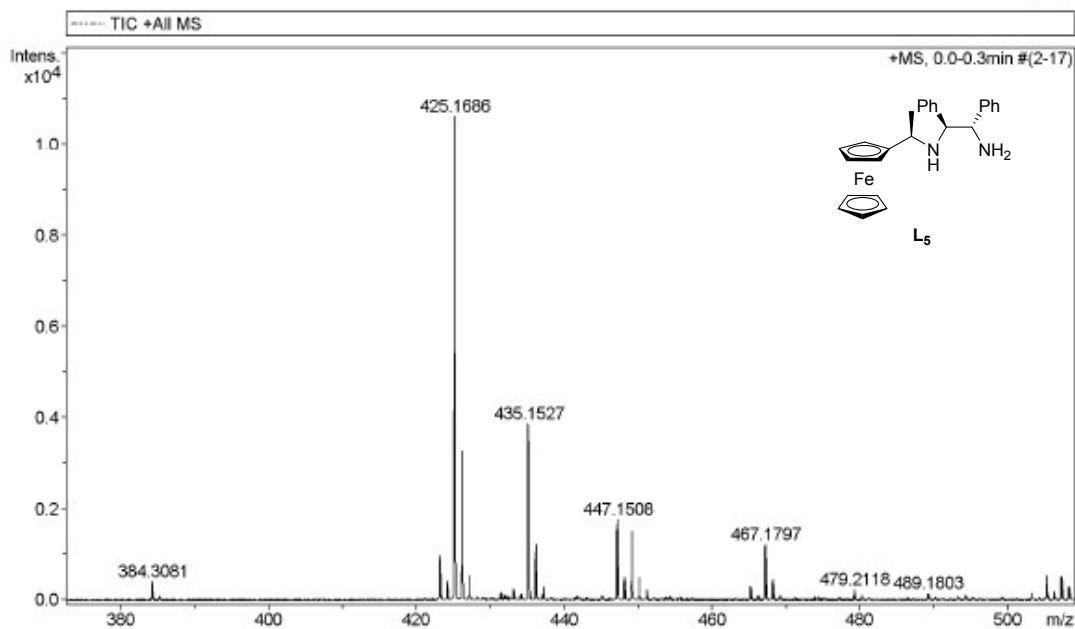

HRMS of L<sub>6</sub>

Display Report

Analysis Info

Analysis Name H:\siyida\_he\_68.d  
 Method tune\_low 50-500.m  
 Sample Name  
 Comment

Acquisition Date 2015-9-25 15:28:31  
 Operator NWU  
 Instrument micrOTOF-Q II 10280

Acquisition Parameter

|             |            |                       |           |                  |           |
|-------------|------------|-----------------------|-----------|------------------|-----------|
| Source Type | ESI        | Ion Polarity          | Positive  | Set Nebulizer    | 0.4 Bar   |
| Focus       | Not active | Set Capillary         | 4500 V    | Set Dry Heater   | 180 °C    |
| Scan Begin  | 50 m/z     | Set End Plate Offset  | -500 V    | Set Dry Gas      | 4.0 l/min |
| Scan End    | 3000 m/z   | Set Collision Cell RF | 110.0 Vpp | Set Divert Valve | Source    |

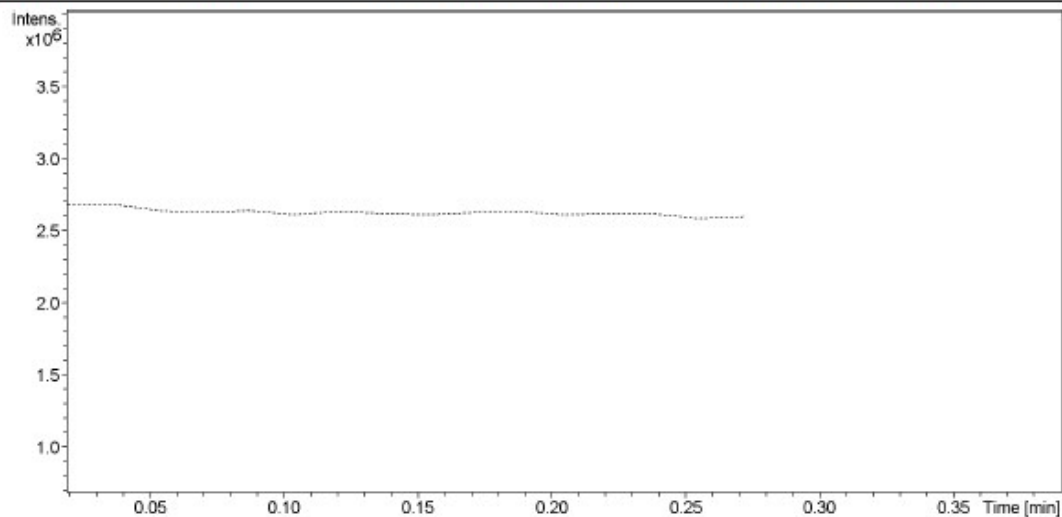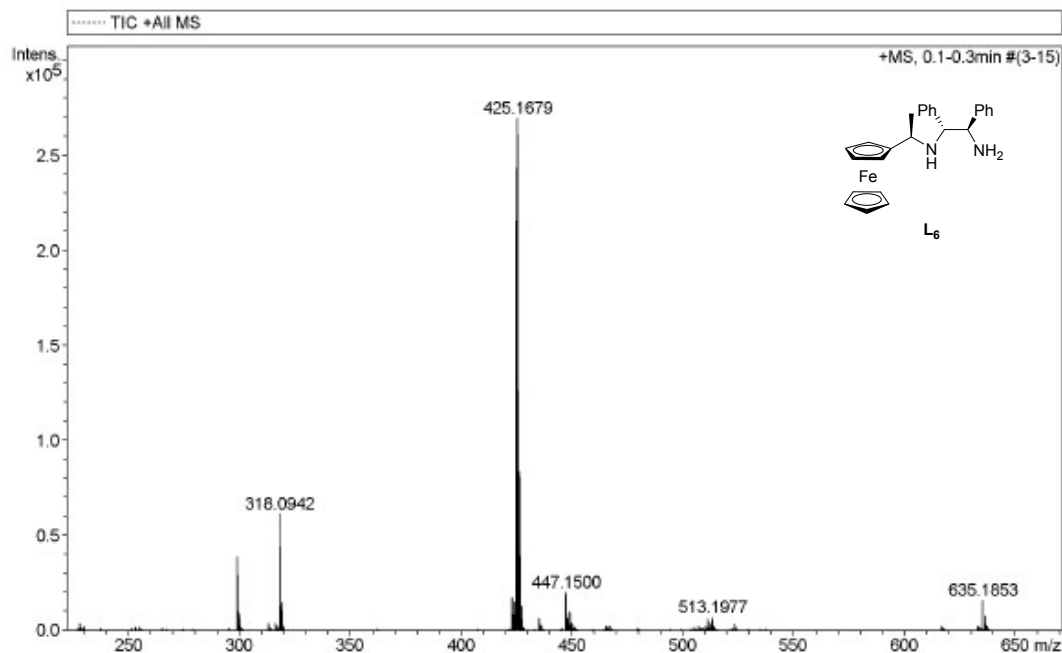

### 3. $^1\text{H}$ and $^{13}\text{C}$ NMR Spectra of 4a-g

#### $^1\text{H}$ NMR Spectra of (S)-4a

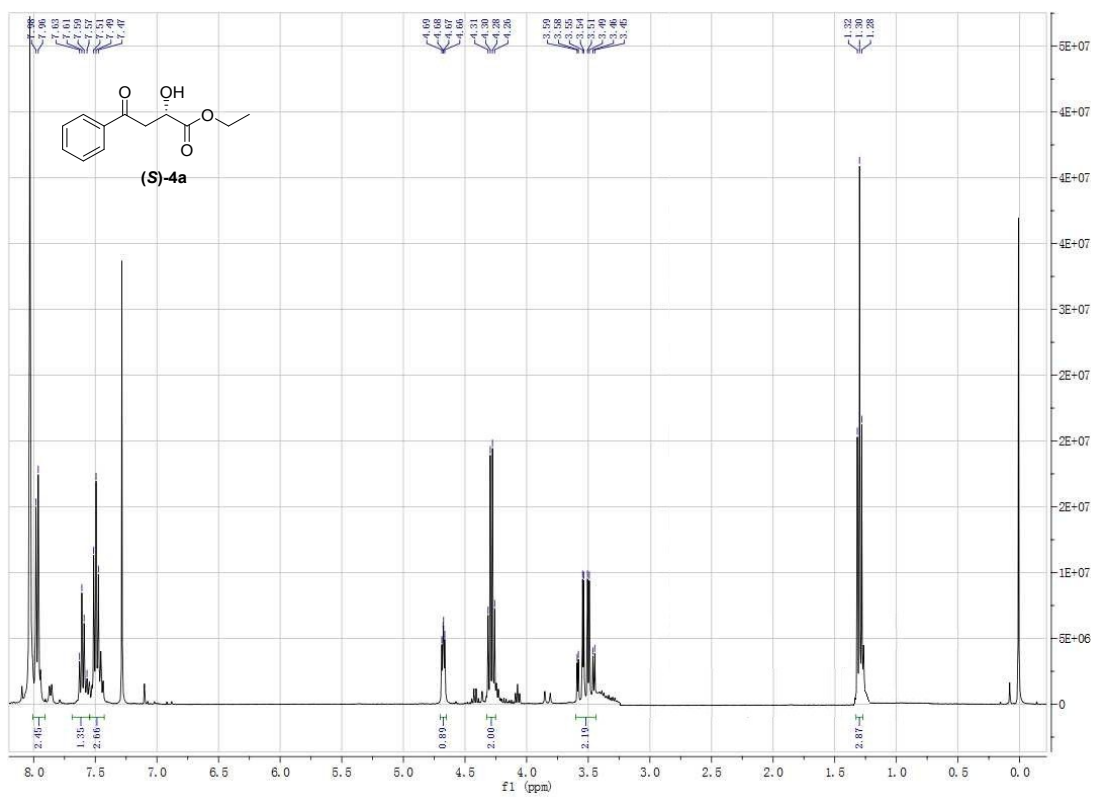

#### $^{13}\text{C}$ NMR Spectra of (S)-4a



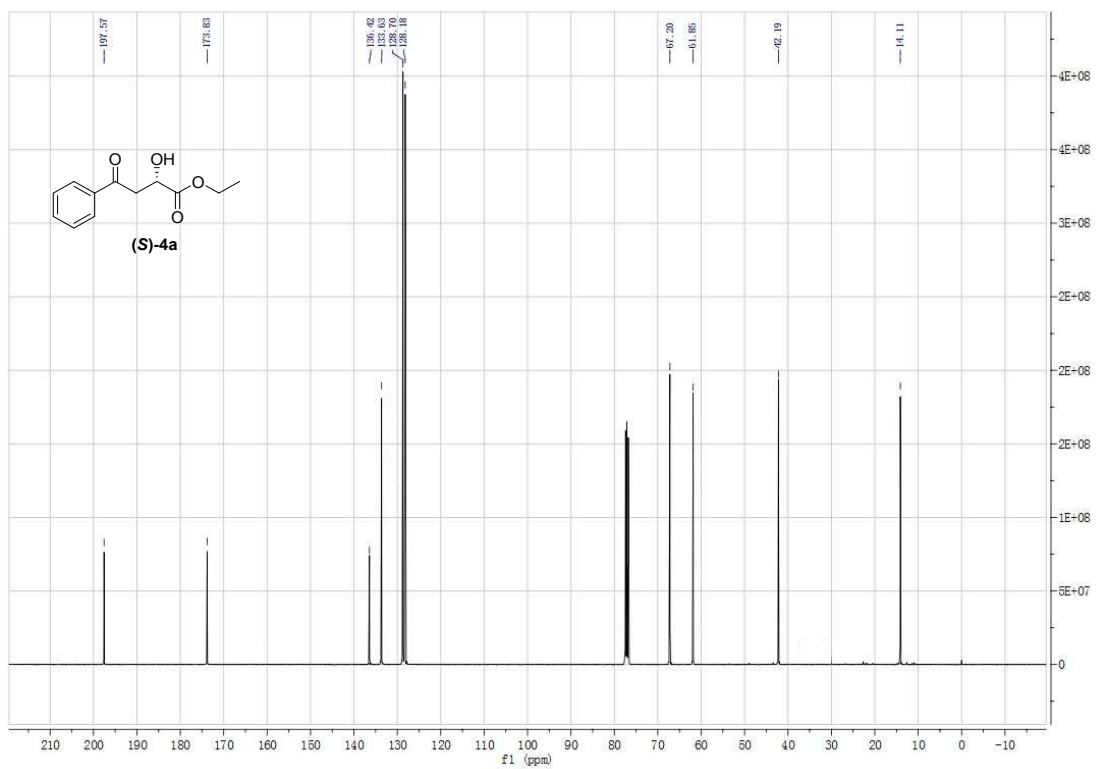

**<sup>1</sup>H NMR Spectra of (R)-4b**

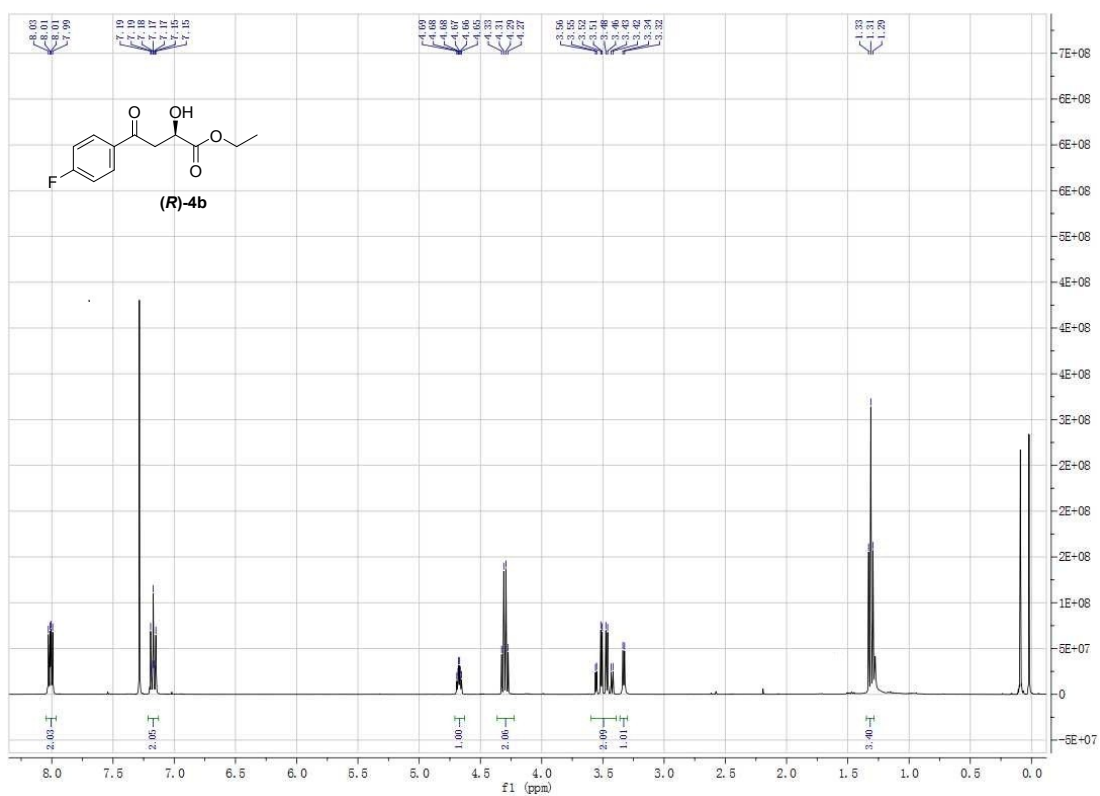

**<sup>13</sup>C NMR Spectra of (R)-4b**

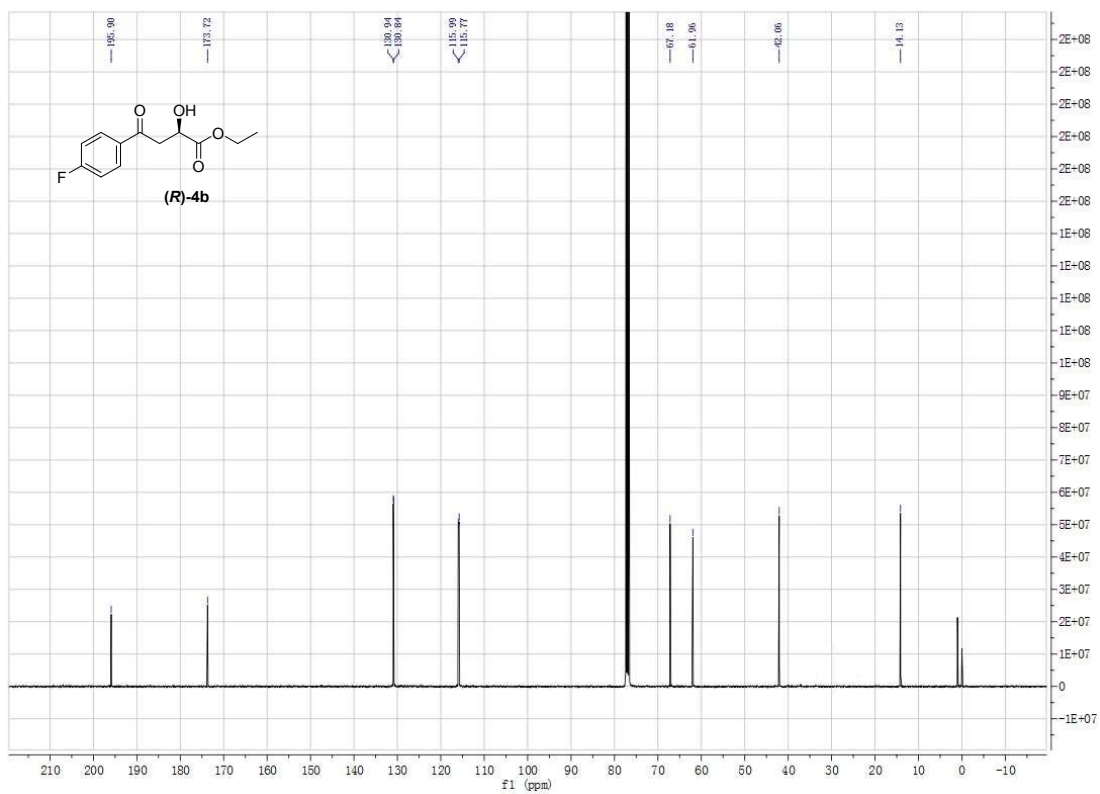

### <sup>1</sup>H NMR Spectra of (R)-4c

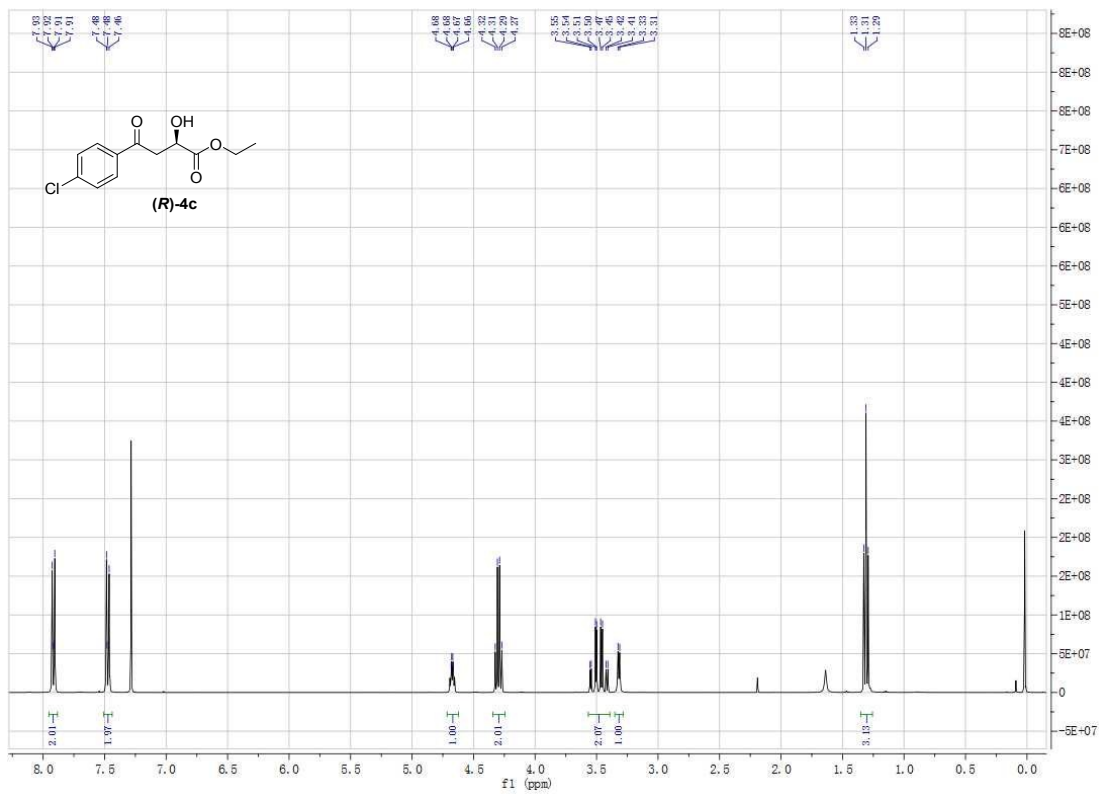

### <sup>13</sup>C NMR Spectra of (R)-4c

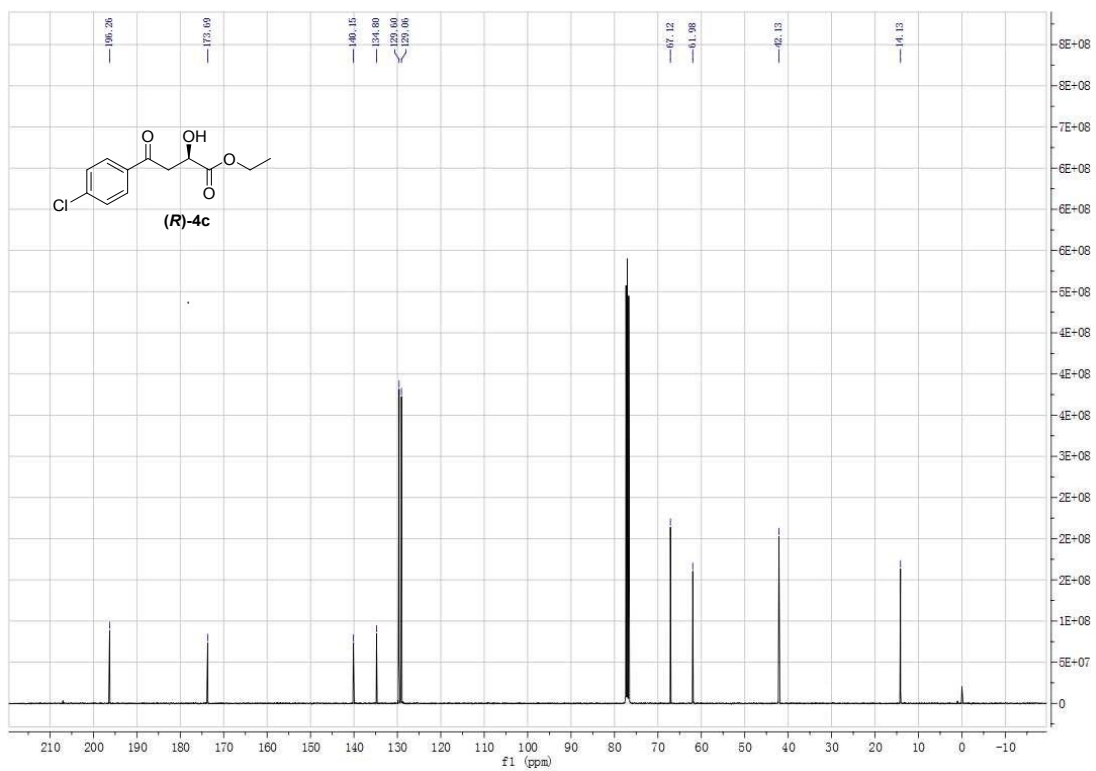

### <sup>1</sup>H NMR Spectra of (R)-4d

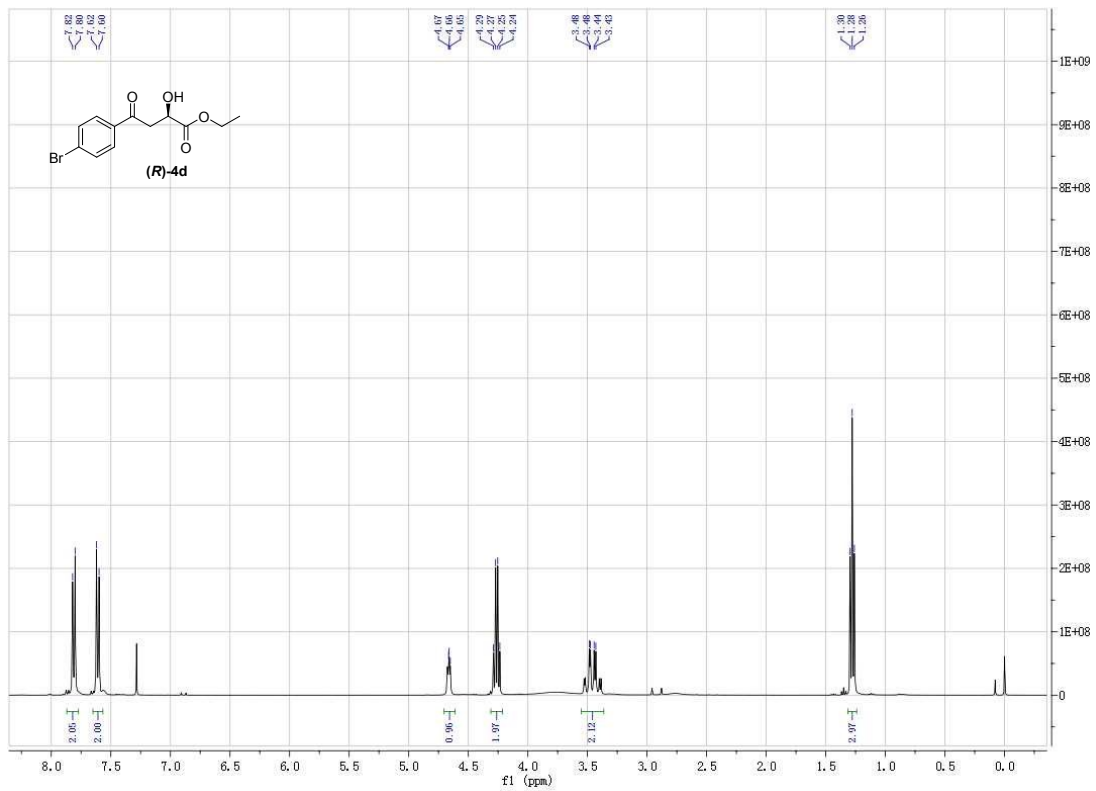

### <sup>13</sup>C NMR Spectra of (R)-4d

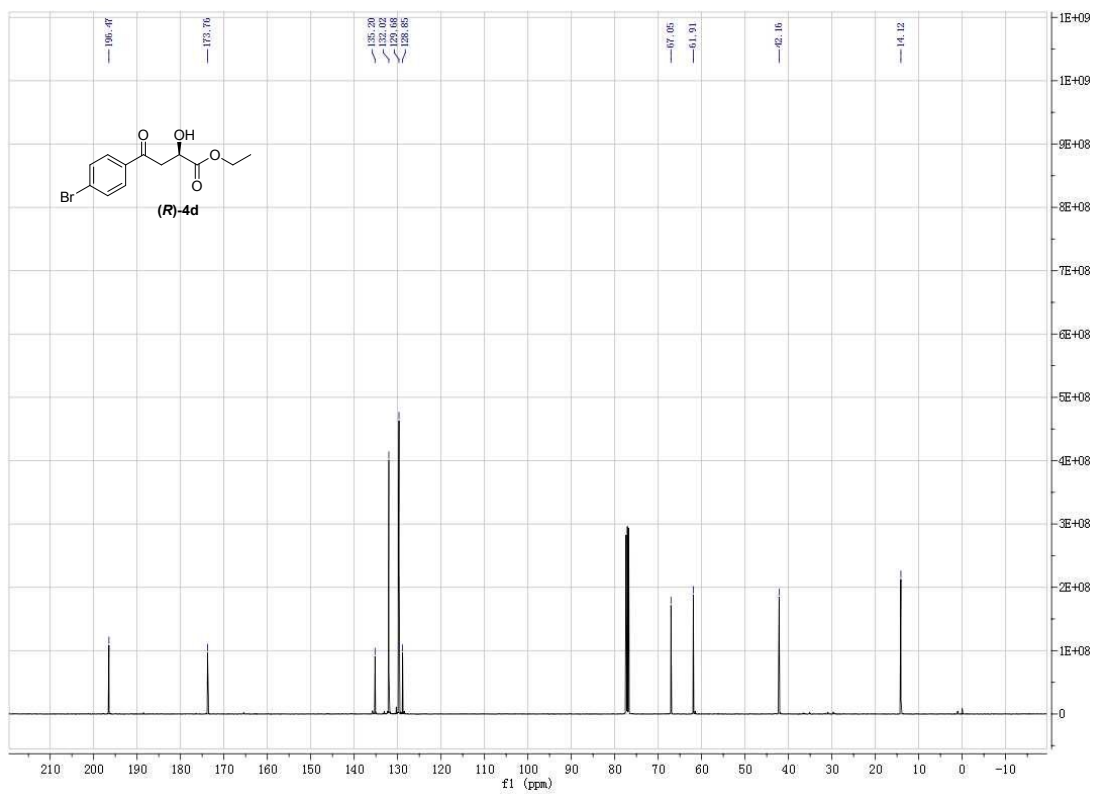

### <sup>1</sup>H NMR Spectra of (R)-4e

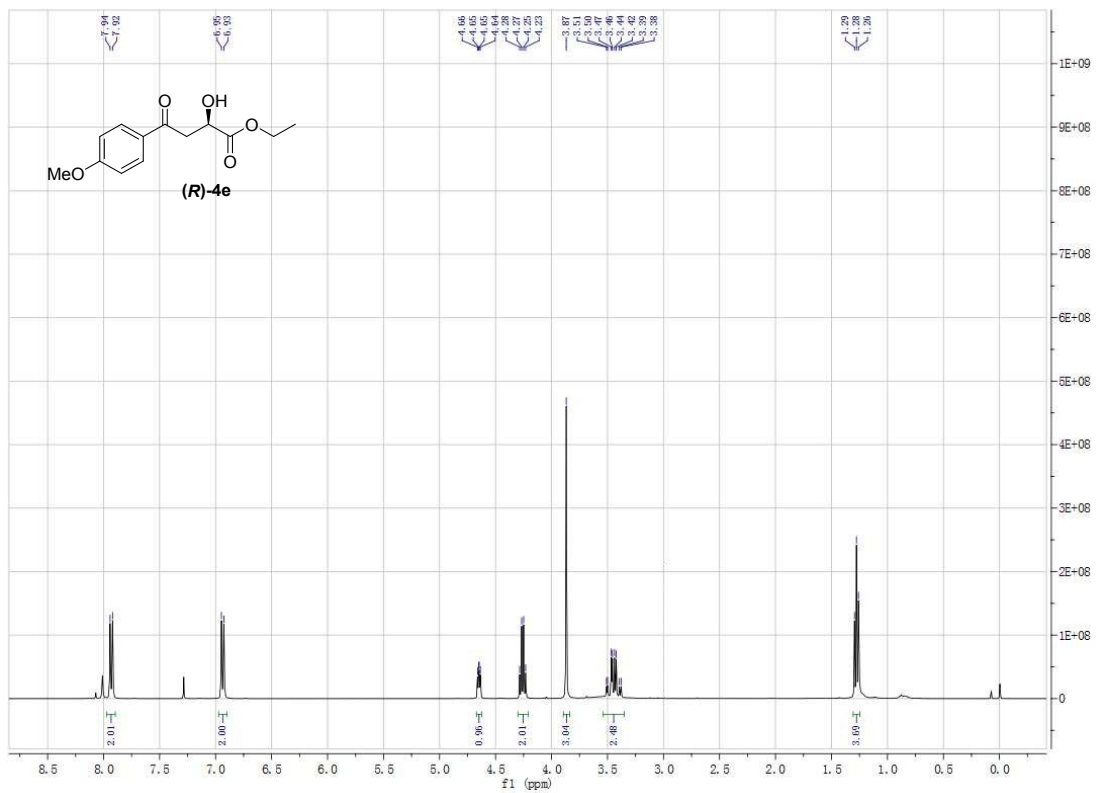

### <sup>13</sup>C NMR Spectra of (R)-4e

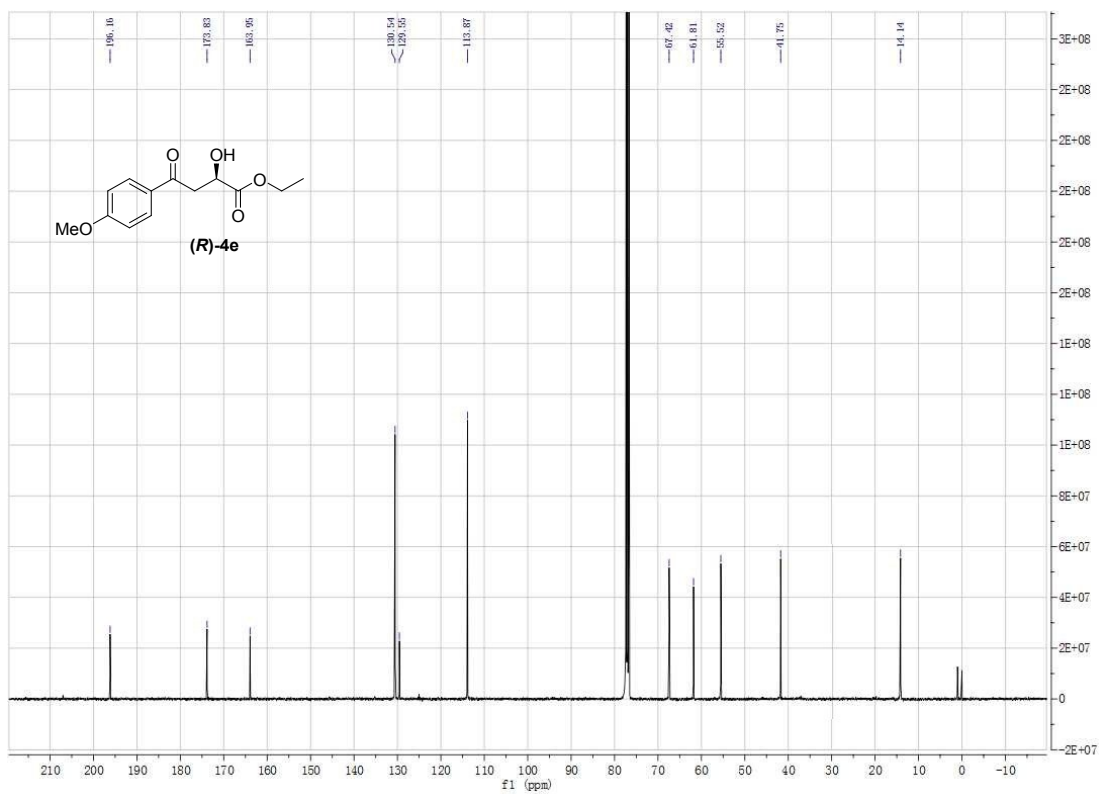

**<sup>1</sup>H NMR Spectra of (R)-4f**

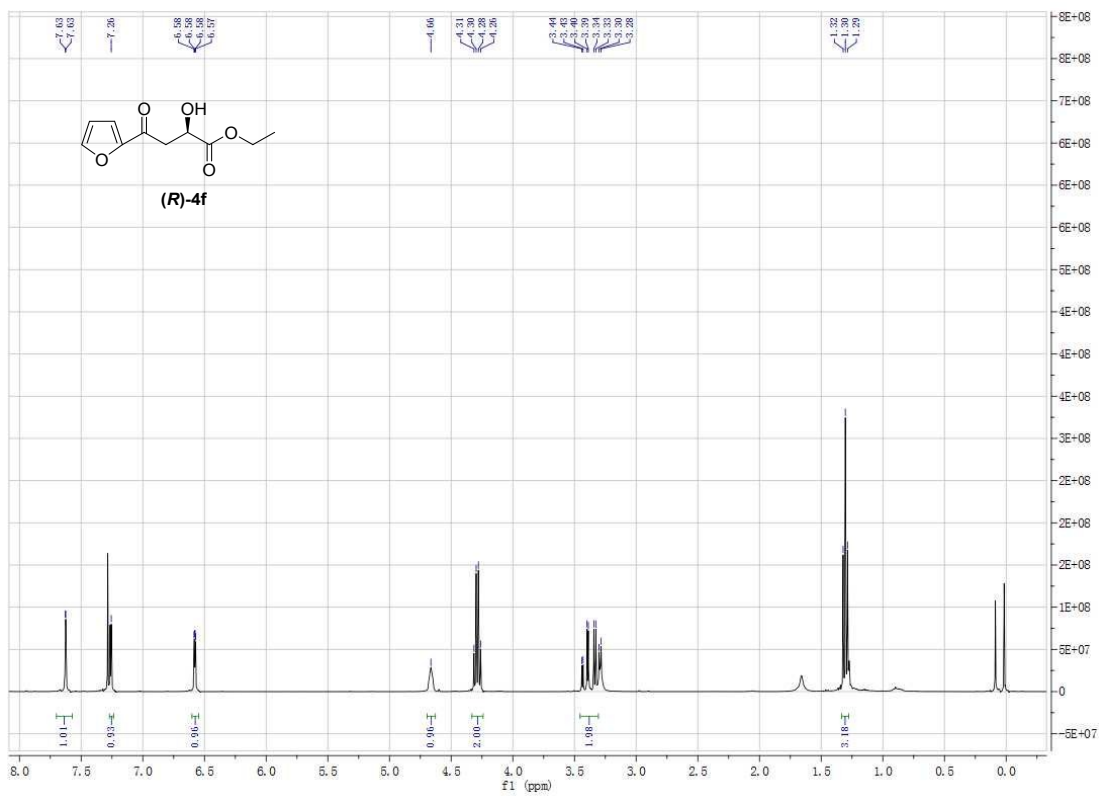

**<sup>13</sup>C NMR Spectra of (R)-4f**

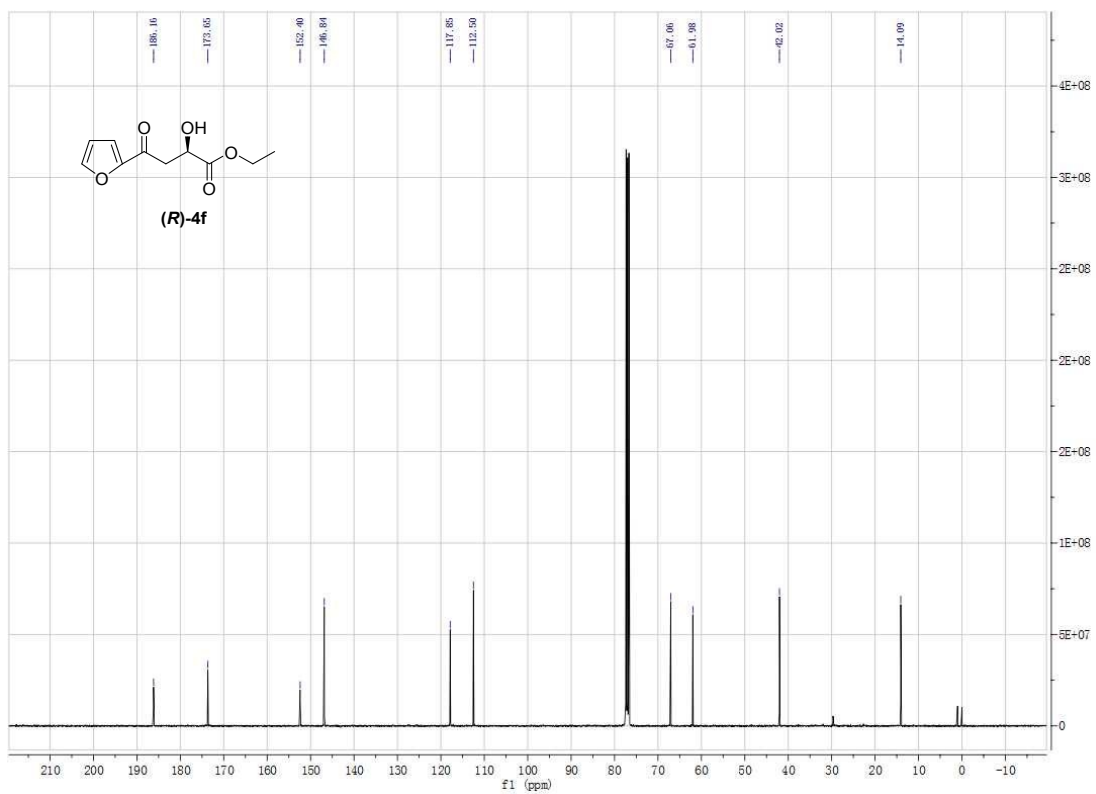

**<sup>1</sup>H NMR Spectra of (R)-4g**

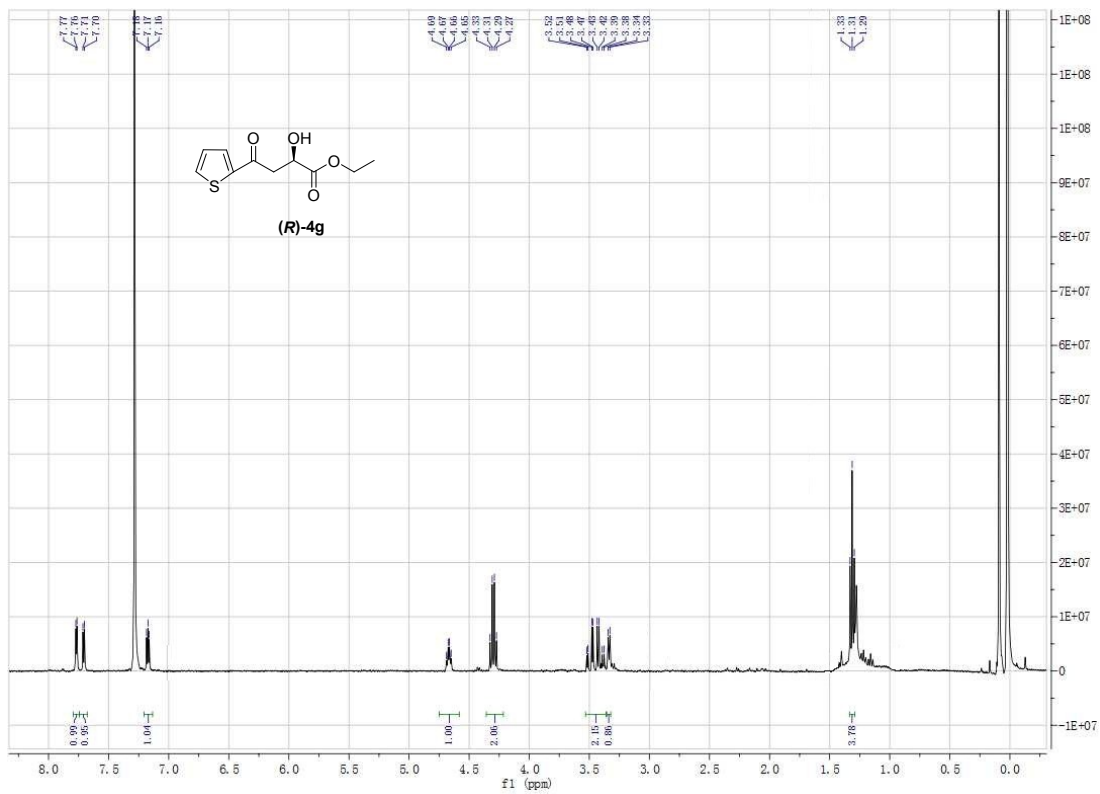

**<sup>13</sup>C NMR Spectra of (R)-4g**

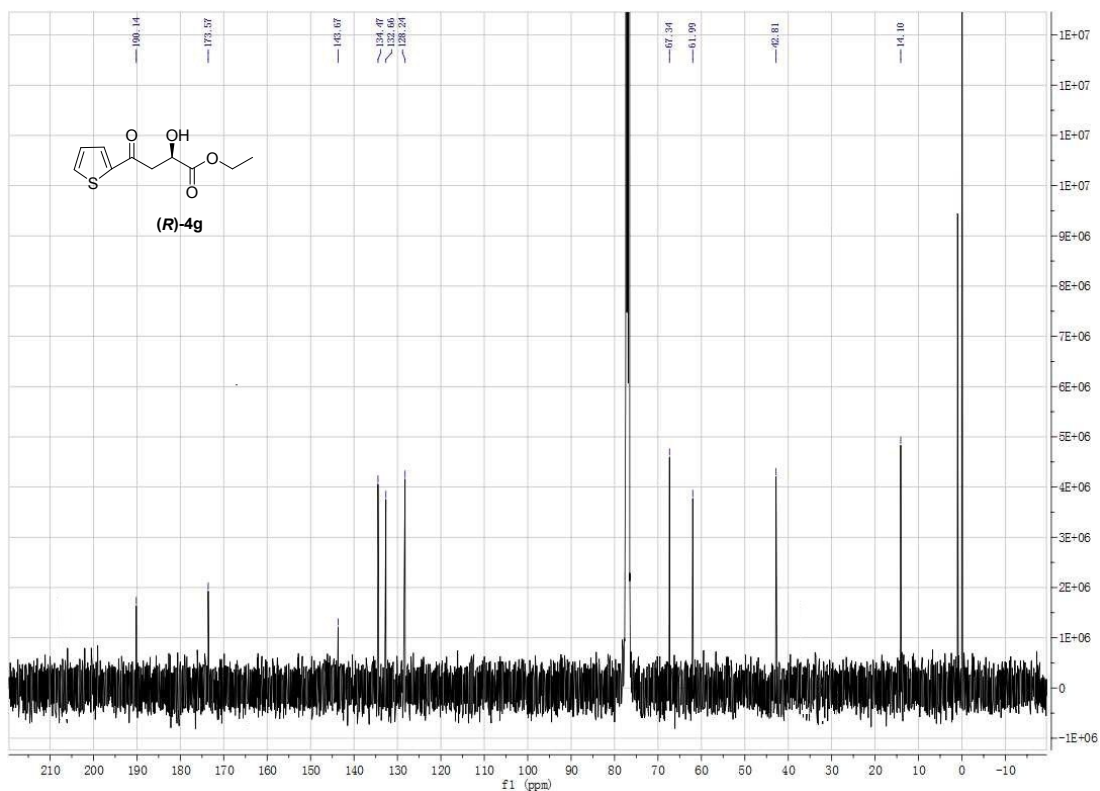

#### 4.HPLC charts of [catalyst was RuCl [TsDPEN ](cymene)]

##### 4-phenyl-2-hydroxy-4-oxo-butyrac acid ethyl ester (4a)

85% yield, 84% ee in DMF, 30% yield, 73% ee in MeOH, 73% yield, 50% ee in THF, 80% yield, 22% ee in EtOAc, 77% yield, 60% ee in dioxane., 82% yield, 81% ee in *t*-BuOMe , 75% yield, 79% ee without solvent at r.t., 80% yield, 84% ee in DMF at 0°C, 68% yield, 94% ee in DMF at -20°C, 68% yield, 94% ee in DMF at -20°C (*R*-configuration) for 4days, determined by HPLC analysis (Chiralcel OD-H column, Hexane/*i*-PrOH=95/5, Flow rate: 0.5 mL/min, UV detection at 254 nm).

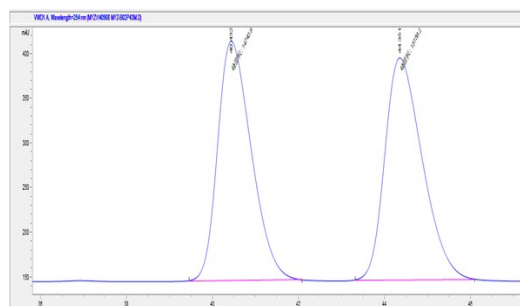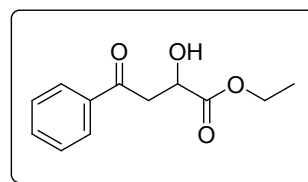

| # | Time   | Peak area | Peak height | Peak width | Symmetry factor | Peak area% |
|---|--------|-----------|-------------|------------|-----------------|------------|
| 1 | 40.432 | 14740.9   | 269.7       | 0.911      | 0.668           | 49.301     |
| 2 | 44.351 | 15159.2   | 249.9       | 1.011      | 0.656           | 50.699     |

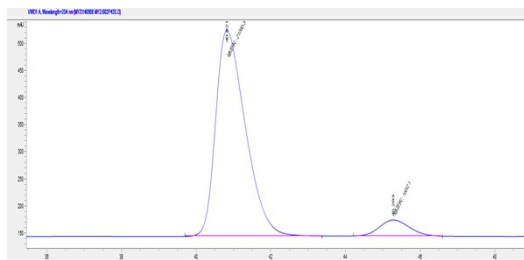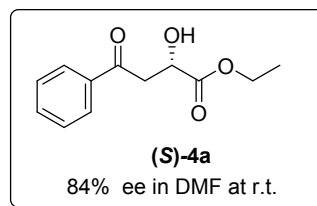

| # | Time   | Peak area | Peak height | Peak width | Symmetry factor | Peak area% |
|---|--------|-----------|-------------|------------|-----------------|------------|
| 1 | 40.821 | 21060.3   | 381.8       | 0.9193     | 0.596           | 92.808     |
| 2 | 45.283 | 1632.1    | 29.6        | 0.9186     | 0.859           | 7.192      |

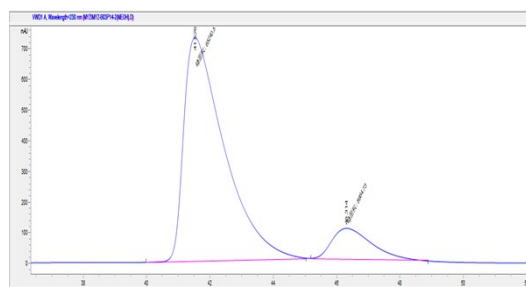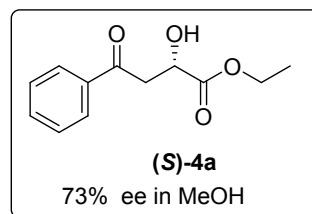

| # | Time   | Peak area | Peak height | Peak width | Symmetry factor | Peak area% |
|---|--------|-----------|-------------|------------|-----------------|------------|
| 1 | 41.526 | 65240.5   | 728.7       | 1.4923     | 0.377           | 86.276     |
| 2 | 46.314 | 8664.7    | 100.3       | 1.4404     | 0.583           | 13.724     |

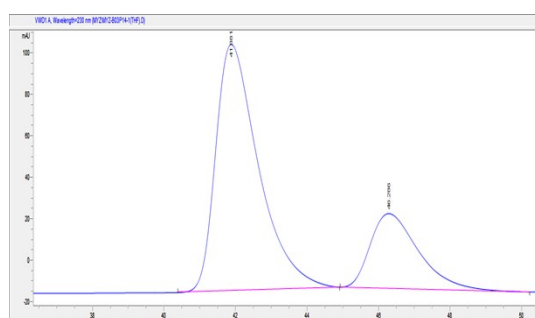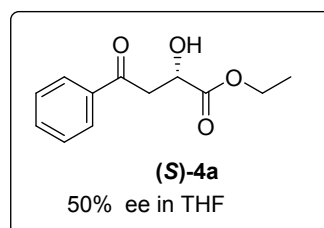

| # | Time   | Peak area | Peak height | Peak width | Symmetry factor | Peak area% |
|---|--------|-----------|-------------|------------|-----------------|------------|
| 1 | 41.881 | 9898.4    | 119.1       | 1.2439     | 0.54            | 74.470     |
| 2 | 46.286 | 3393.5    | 36.2        | 1.4092     | 0.589           | 25.530     |



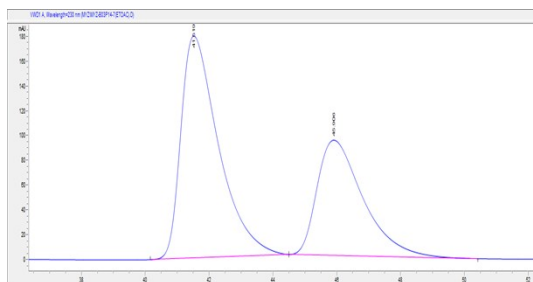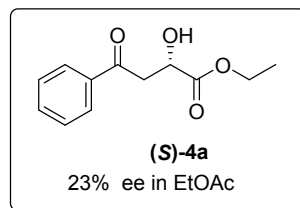

| # | Time   | Peak area | Peak height | Peak width | Symmetry factor | Peak area% |
|---|--------|-----------|-------------|------------|-----------------|------------|
| 1 | 41.519 | 14674.8   | 179.2       | 1.2296     | 0.492           | 61.156     |
| 2 | 45.906 | 9320.8    | 93          | 1.5052     | 0.54            | 38.844     |

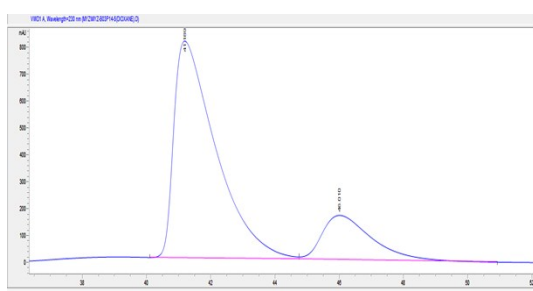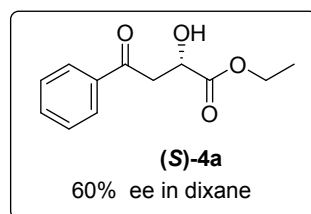

| # | Time   | Peak area | Peak height | Peak width | Symmetry factor | Peak area% |
|---|--------|-----------|-------------|------------|-----------------|------------|
| 1 | 41.189 | 73990.8   | 810.6       | 1.3239     | 0.324           | 80.313     |
| 2 | 46.01  | 18136.9   | 166.9       | 1.6179     | 0.512           | 19.687     |

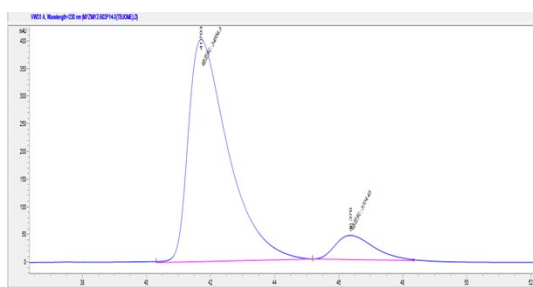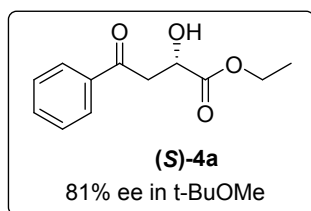

| # | Time   | Peak area | Peak height | Peak width | Symmetry factor | Peak area% |
|---|--------|-----------|-------------|------------|-----------------|------------|
| 1 | 41.703 | 34954.5   | 403.9       | 1.4423     | 0.457           | 90.418     |
| 2 | 46.37  | 3704.5    | 44          | 1.4038     | 0.625           | 9.582      |

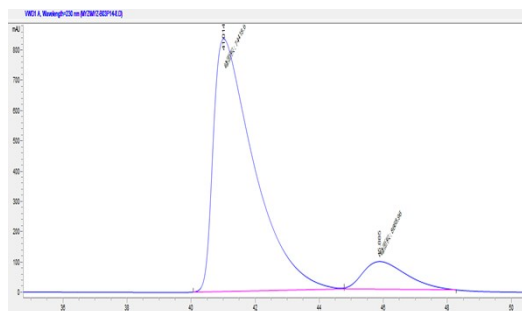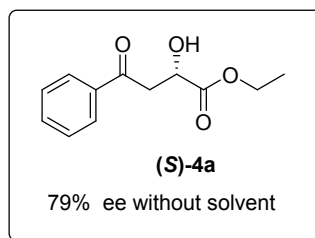

| # | Time   | Peak area | Peak height | Peak width | Symmetry factor | Peak area% |
|---|--------|-----------|-------------|------------|-----------------|------------|
| 1 | 41.014 | 74418.6   | 841.1       | 1.4747     | 0.336           | 89.566     |
| 2 | 45.885 | 8669      | 91.9        | 1.5723     | 0.613           | 10.434     |

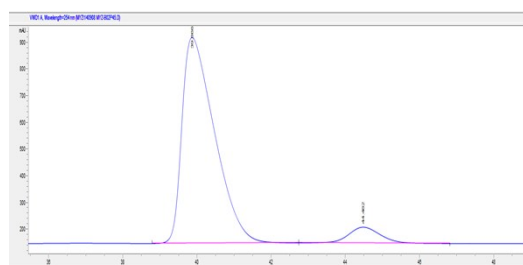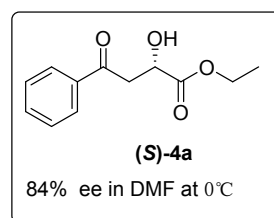

| # | Time   | Peak area | Peak height | Peak width | Symmetry factor | Peak area% |
|---|--------|-----------|-------------|------------|-----------------|------------|
| 1 | 39.866 | 2708.3    | 772.1       | 0.9325     | 0.429           | 92.953     |
| 2 | 44.482 | 2569.7    | 59.8        | 0.9117     | 0.851           | 7.047      |

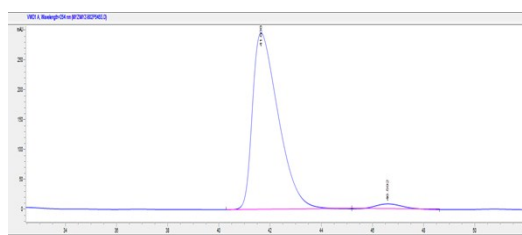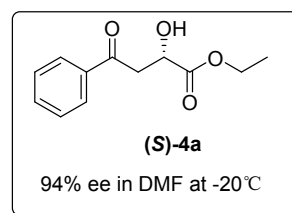

| # | Time   | Peak area | Peak height | Peak width | Symmetry factor | Peak area% |
|---|--------|-----------|-------------|------------|-----------------|------------|
| 1 | 41.638 | 20774.9   | 295.9       | 1.0682     | 0.467           | 96.944     |
| 2 | 46.592 | 655       | 8.7         | 1.1186     | 0.825           | 3.056      |

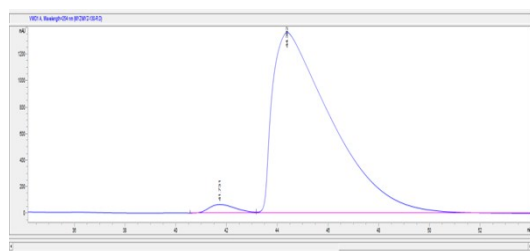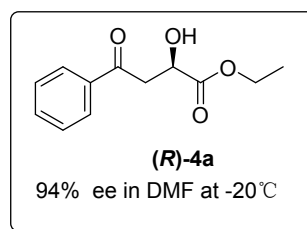

| # | Time   | Peak area | Peak height | Peak width | Symmetry factor | Peak area% |
|---|--------|-----------|-------------|------------|-----------------|------------|
| 1 | 42.301 | 8928.5    | 112.6       | 1.2002     | 0.682           | 2.997      |
| 2 | 44.533 | 319693.1  | 1908.1      | 2.3337     | 0.115           | 97.003     |

**4-(4-F-phenyl)-2-hydroxy-4-oxo-butyric acid ethyl ester (4b) — RuCl(*p*-cymene)[(R,R)-Ts-DPEN]**

61% yield, 91% ee determined by HPLC analysis (Chiralcel OJ-H column, Hexane/*i*-PrOH=95/5, Flow rate: 1 mL/min, UV detection at 254 nm).

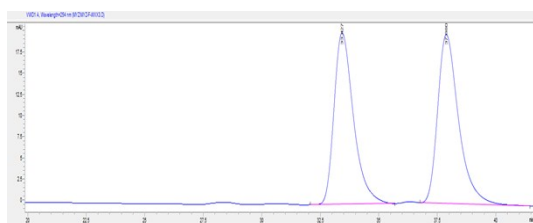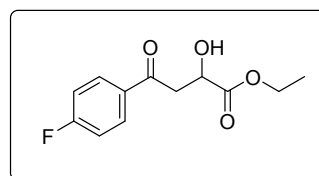

| # | Time   | Peak area | Peak height | Peak width | Symmetry factor | Peak area% |
|---|--------|-----------|-------------|------------|-----------------|------------|
| 1 | 33.427 | 1175      | 20.3        | 0.882      | 0.665           | 48.600     |
| 2 | 37.88  | 1242.7    | 20          | 0.9325     | 0.648           | 51.400     |

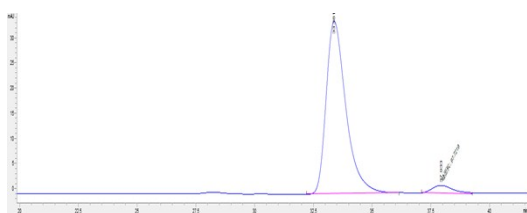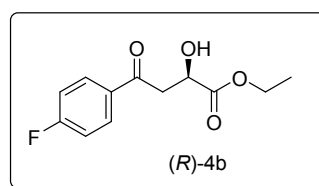

| # | Time   | Peak area | Peak height | Peak width | Symmetry factor | Peak area% |
|---|--------|-----------|-------------|------------|-----------------|------------|
| 1 | 33.381 | 2006.7    | 34.3        | 0.8881     | 0.643           | 95.356     |
| 2 | 37.933 | 97.7      | 1.6         | 1.0393     | 0.719           | 4.644      |

**4-(4-Cl-phenyl)-2-hydroxy-4-oxo-butyric acid ethyl ester (4c) — RuCl(*p*-cymene)[(R,R)-Ts-DPEN]**

58% yield, 91% ee determined by HPLC analysis (Chiralcel OD-H column, Hexane/*i*-PrOH=93/7, Flow rate: 1

mL/min, UV detection at 254 nm).

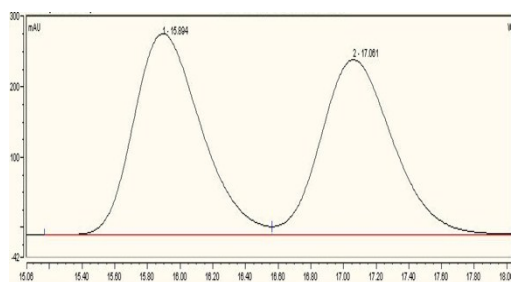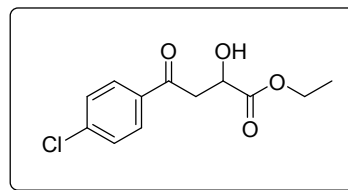

| # | Time   | Peak area | Peak height | Peak area% |
|---|--------|-----------|-------------|------------|
| 1 | 15.894 | 137.1400  | 286.632     | 51.78      |
| 2 | 17.061 | 127.7091  | 249.467     | 48.22      |

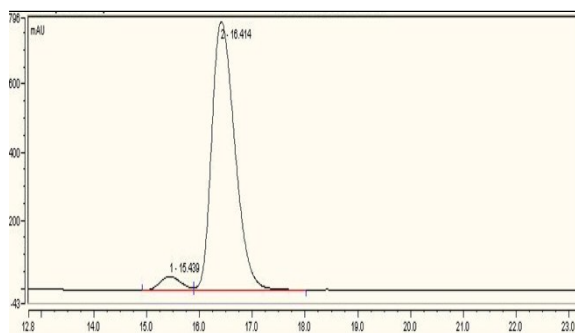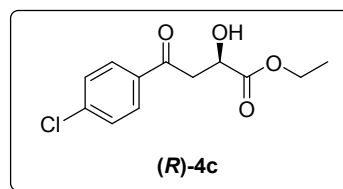

| # | Time   | Peak area | Peak height | Peak area% |
|---|--------|-----------|-------------|------------|
| 1 | 15.439 | 19.2280   | 41.408      | 4.59       |
| 2 | 16.414 | 399.4082  | 787.955     | 95.41      |

#### 4-(4-Br-phenyl)-2-hydroxy-4-oxo-butyrac acid ethyl ester (4d) — RuCl(*p*-cymene)[(*R,R*)-Ts-DPEN]

60% yield, 91% ee determined by HPLC analysis (Chiralcel OD-H column, Hexane/*i*-PrOH=90/10, Flow rate: 0.5 mL/min, UV detection at 254 nm).

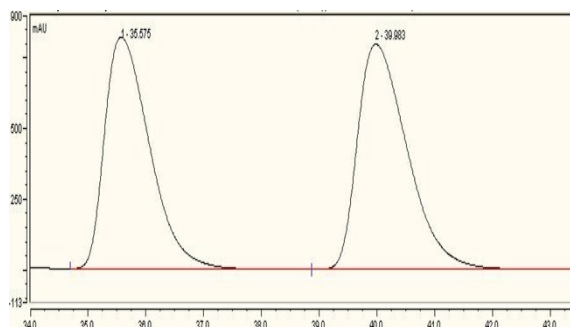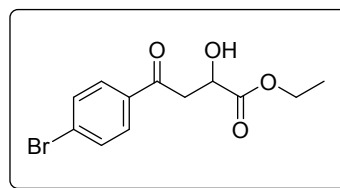

| # | Time | Peak area | Peak height | Peak |
|---|------|-----------|-------------|------|
|---|------|-----------|-------------|------|

|   |        |          |         | area% |
|---|--------|----------|---------|-------|
| 1 | 35.575 | 735.0525 | 818.551 | 48.15 |
| 2 | 39.983 | 791.6492 | 795.476 | 51.85 |

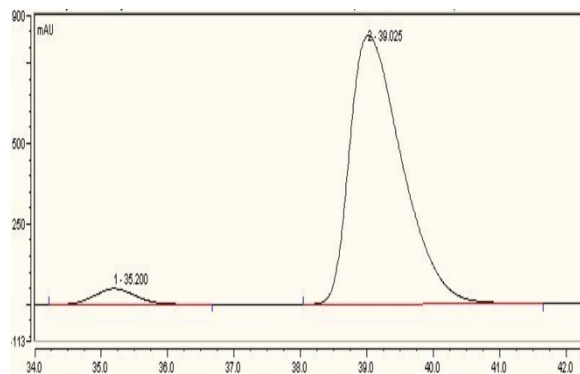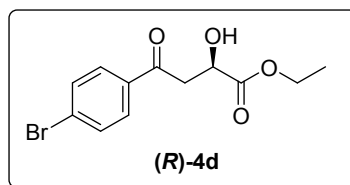

| # | Time   | Peak area | Peak height | Peak area% |
|---|--------|-----------|-------------|------------|
| 1 | 35.200 | 35.4044   | 49.193      | 4.44       |
| 2 | 39.025 | 762.2163  | 835.512     | 95.56      |

#### 4-(4-OMe-phenyl)-2-hydroxy-4-oxo-butyric acid ethyl ester (**4e**) — RuCl(*p*-cymene)[(*R,R*)-TsDPEN]

58% yield, 94.5% ee determined by HPLC analysis (Chiralcel AD-H column, Hexane/*i*-PrOH=95/5, Flow rate: 1 mL/min, UV detection at 254 nm).

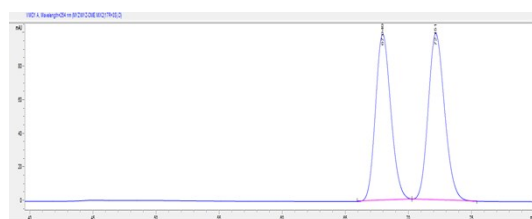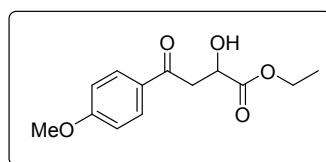

| # | Time   | Peak area | Peak height | Peak width | Symmetry factor | Peak area% |
|---|--------|-----------|-------------|------------|-----------------|------------|
| 1 | 67.949 | 8372.3    | 99.3        | 1.2843     | 0.853           | 48.268     |
| 2 | 72.151 | 8973.2    | 99.5        | 1.4086     | 0.812           | 51.732     |

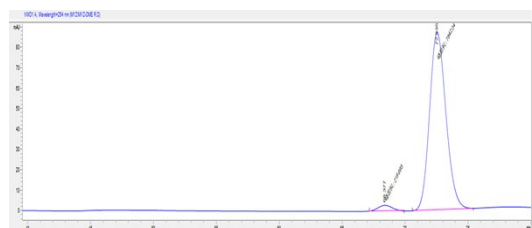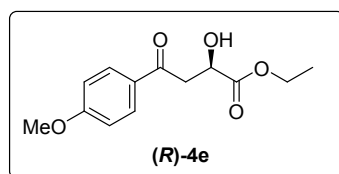

| # | Time   | Peak area | Peak height | Peak width | Symmetry factor | Peak area% |
|---|--------|-----------|-------------|------------|-----------------|------------|
| 1 | 68.377 | 219.7     | 2.8         | 1.3139     | 0.909           | 2.725      |
| 2 | 72.535 | 7842      | 86.7        | 1.5071     | 0.842           | 97.275     |

**4-furyl-2-hydroxy-4-oxo-butyric acid ethyl ester (4f) — RuCl(*p*-cymene)[(R,R)-Ts-DPEN]**

55% yield, 96% ee determined by HPLC analysis (Chiralcel OJ-H column, Hexane/*i*-PrOH=95/5, Flow rate: 1 mL/min, UV detection at 254 nm).

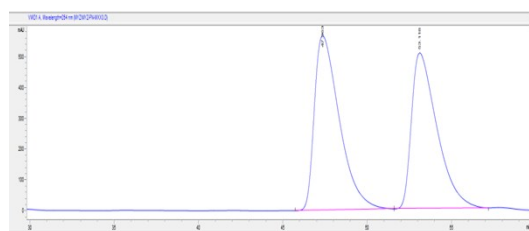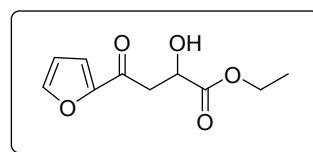

| # | Time   | Peak area | Peak height | Peak width | Symmetry factor | Peak area% |
|---|--------|-----------|-------------|------------|-----------------|------------|
| 1 | 47.363 | 58545.2   | 567.3       | 1.5931     | 0.467           | 52.401     |
| 2 | 53.118 | 53179.9   | 506.5       | 1.578      | 0.451           | 47.599     |

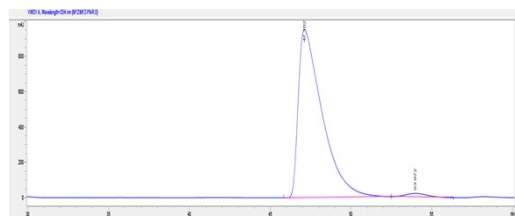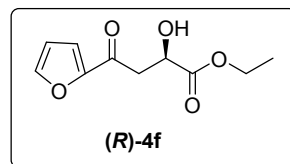

| # | Time   | Peak area | Peak height | Peak width | Symmetry factor | Peak area% |
|---|--------|-----------|-------------|------------|-----------------|------------|
| 1 | 47.102 | 97470     | 951.2       | 1.4575     | 0.321           | 98.127     |
| 2 | 53.972 | 1860.2    | 20.3        | 1.3956     | 0.813           | 1.873      |

**4-thienyl-2-hydroxy-4-oxo-butyric acid ethyl ester (4g) — RuCl(*p*-cymene)[(R,R)-Ts-DPEN]**

71% yield, 95% ee. determined by HPLC analysis (Chiralcel OJ-H column, Hexane/*i*-PrOH=95/5, Flow rate: 1 mL/min, UV detection at 254 nm).

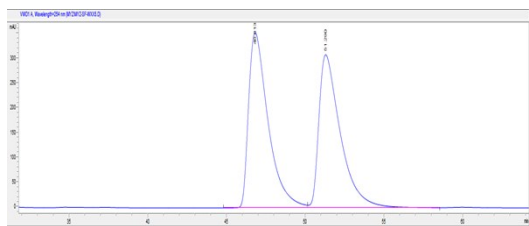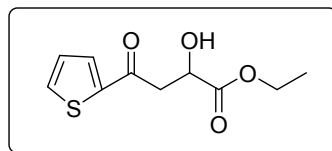

| # | Time   | Peak area | Peak height | Peak width | Symmetry factor | Peak area% |
|---|--------|-----------|-------------|------------|-----------------|------------|
| 1 | 46.813 | 30557.2   | 354.4       | 1.3079     | 0.468           | 51.012     |
| 2 | 51.29  | 29344.4   | 309.6       | 1.4038     | 0.429           | 48.988     |

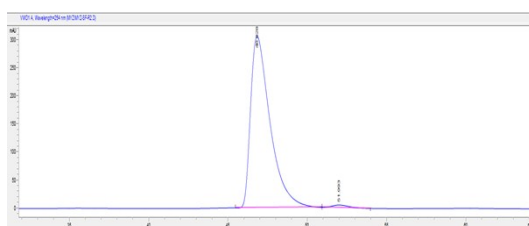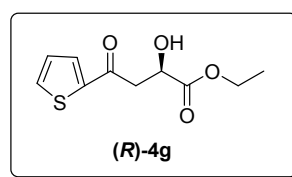

| # | Time   | Peak area | Peak height | Peak width | Symmetry factor | Peak area% |
|---|--------|-----------|-------------|------------|-----------------|------------|
| 1 | 46.828 | 26226.1   | 306.8       | 1.2814     | 0.471           | 98.708     |
| 2 | 51.993 | 343.2     | 4.9         | 0.9975     | 0.726           | 1.292      |

## 5.HPLC charts 4a-4g [catalyst was ferrocene-based chiral ligand]

### 4-phenyl-2-hydroxy-4-oxo-butyric acid ethyl ester (4a)

72% yield, 5% ee catalyzed by L<sub>2</sub> in DMF at r.t., 57% yield, 90% ee catalyzed by L<sub>1</sub>, 60% yield, 65% ee catalyzed by L<sub>2</sub>, 55% yield, 50% ee catalyzed by L<sub>3</sub>, 47% yield, racemic catalyzed by L<sub>4</sub>, 50% yield, 40% ee catalyzed by L<sub>5</sub>, 52% yield, 37% ee catalyzed by L<sub>6</sub> in DMF at -20°C for 4days, determined by HPLC analysis (Chiralcel OD-H column, Hexane/i-PrOH=95/5, Flow rate: 0.5 mL/min, UV detection at 254 nm).

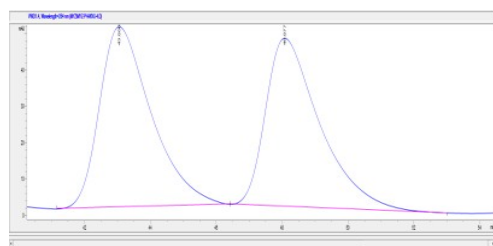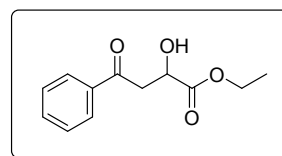

| # | Time   | Peak area | Peak height | Peak width | Symmetry factor | Peak area% |
|---|--------|-----------|-------------|------------|-----------------|------------|
| 1 | 43.05  | 5475.5    | 49.9        | 1.614      | 0.588           | 50.736     |
| 2 | 48.077 | 5317      | 46.5        | 1.6733     | 0.517           | 49.265     |

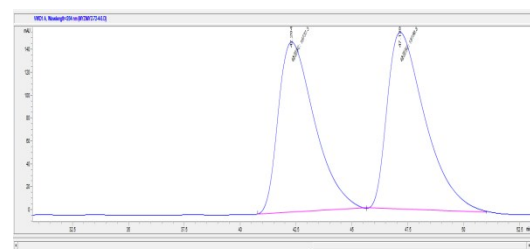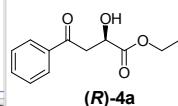

5% ee catalyzed by L<sub>2</sub> at r.t.

| # | Time   | Peak area | Peak height | Peak width | Symmetry factor | Peak area% |
|---|--------|-----------|-------------|------------|-----------------|------------|
| 1 | 42.284 | 16737.3   | 148.2       | 1.8828     | 0.562           | 47.507     |
| 2 | 47.139 | 18199.8   | 153.8       | 1.9722     | 0.501           | 52.493     |



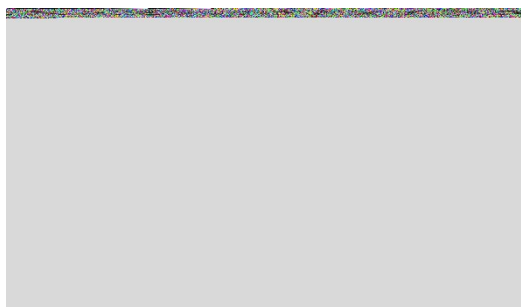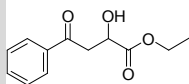

| # | Time   | Peak area | Peak height | Peak width | Symmetry factor | Peak area% |
|---|--------|-----------|-------------|------------|-----------------|------------|
| 1 | 40.432 | 14740.9   | 269.7       | 0.911      | 0.668           | 49.301     |
| 2 | 44.351 | 15159.2   | 249.9       | 1.011      | 0.656           | 50.699     |

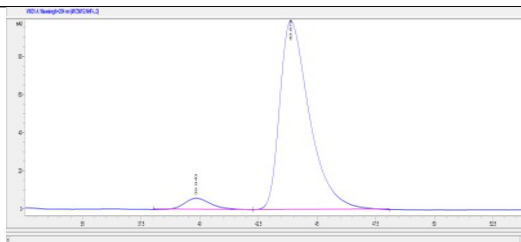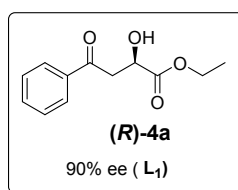

| # | Time   | Peak area | Peak height | Peak width | Symmetry factor | Peak area% |
|---|--------|-----------|-------------|------------|-----------------|------------|
| 1 | 39.483 | 469.3     | 5.9         | 1.1422     | 0.765           | 5.091      |
| 2 | 43.878 | 8748.5    | 99.2        | 1.33       | 0.554           | 94.909     |

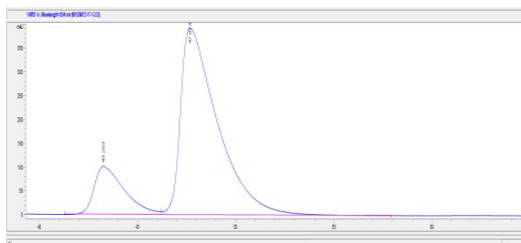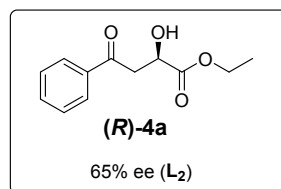

| # | Time   | Peak area | Peak height | Peak width | Symmetry factor | Peak area% |
|---|--------|-----------|-------------|------------|-----------------|------------|
| 1 | 43.253 | 10867.7   | 102         | 1.4165     | 0.435           | 17.423     |
| 2 | 47.674 | 51506.5   | 392.8       | 1.8838     | 0.33            | 82.577     |

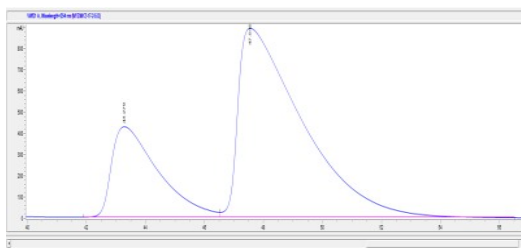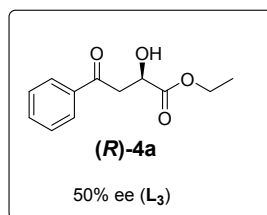

| # | Time   | Peak area | Peak height | Peak width | Symmetry factor | Peak area% |
|---|--------|-----------|-------------|------------|-----------------|------------|
| 1 | 43.279 | 46839.3   | 426.6       | 1.6099     | 0.349           | 25.757     |
| 2 | 47.545 | 135011.3  | 891.2       | 2.1804     | 0.215           | 74.243     |

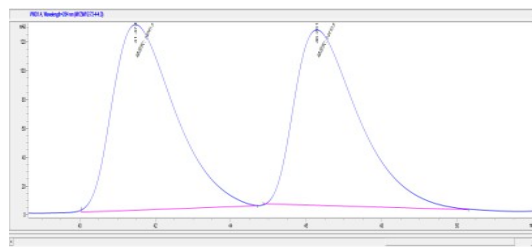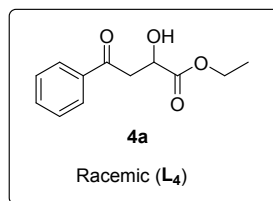

| # | Time   | Peak area | Peak height | Peak width | Symmetry factor | Peak area% |
|---|--------|-----------|-------------|------------|-----------------|------------|
| 1 | 41.474 | 14941.5   | 129..3      | 1.9256     | 0.576           | 50.904     |
| 2 | 46.81  | 14410.8   | 122.2       | 1.966      | 0.527           | 49.096     |

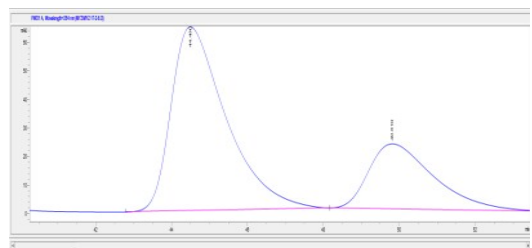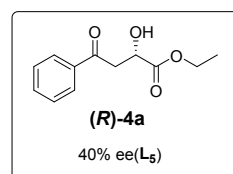

| # | Time  | Peak area | Peak height | Peak width | Symmetry factor | Peak area% |
|---|-------|-----------|-------------|------------|-----------------|------------|
| 1 | 44.49 | 6473.9    | 64.3        | 1.4882     | 0.51            | 70.528     |
| 2 | 49.81 | 2705.3    | 22.8        | 1.6719     | 0.542           | 29.472     |

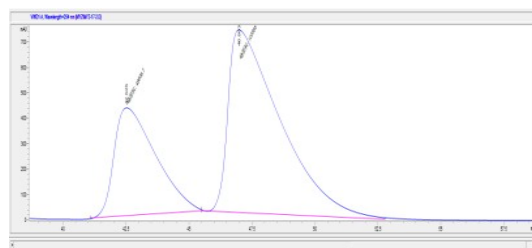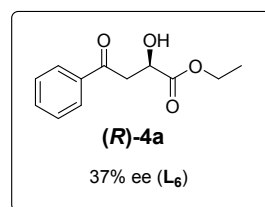

| # | Time   | Peak area | Peak height | Peak width | Symmetry factor | Peak area% |
|---|--------|-----------|-------------|------------|-----------------|------------|
| 1 | 42.525 | 48606.7   | 423.6       | 1.9124     | 0.43            | 31.943     |
| 2 | 46.993 | 716.7     | 22.8        | 2.4084     | 0.261           | 68.057     |

#### 4-(4-F-phenyl)-2-hydroxy-4-oxo-butyric acid ethyl ester (4b) —L<sub>1</sub>

55% yield, 69% ee determined by HPLC analysis (Chiralcel OJ-H column, Hexane/i-PrOH=95/5, Flow rate: 1 mL/min, UV detection at 254 nm).

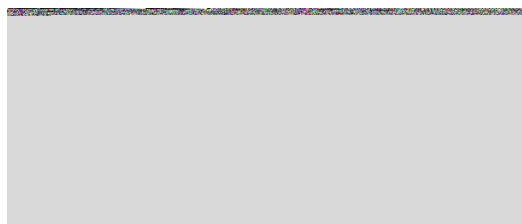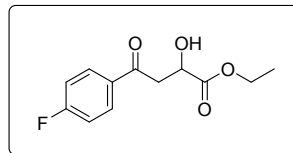

| # | Time   | Peak area | Peak height | Peak width | Symmetry factor | Peak area% |
|---|--------|-----------|-------------|------------|-----------------|------------|
| 1 | 33.427 | 1175      | 20.3        | 0.882      | 0.665           | 48.600     |
| 2 | 37.88  | 1242.7    | 20          | 0.9325     | 0.648           | 51.400     |

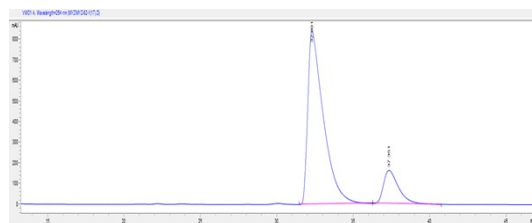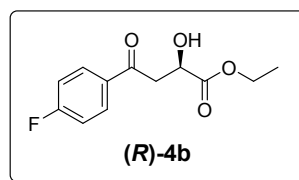

| # | Time   | Peak area | Peak height | Peak width | Symmetry factor | Peak area% |
|---|--------|-----------|-------------|------------|-----------------|------------|
| 1 | 32.301 | 59937.7   | 841.9       | 1.0216     | 0.335           | 84.408     |
| 2 | 37.351 | 11072.1   | 162.1       | 1.0298     | 0.543           | 15.592     |

#### 4-(4-Cl-phenyl)-2-hydroxy-4-oxo-butyric acid ethyl ester (4c) —L<sub>1</sub>

58% yield, 67% ee determined by HPLC analysis (Chiralcel OJ-H column, Hexane/i-PrOH=95/5, Flow rate: 1 mL/min, UV detection at 254 nm).

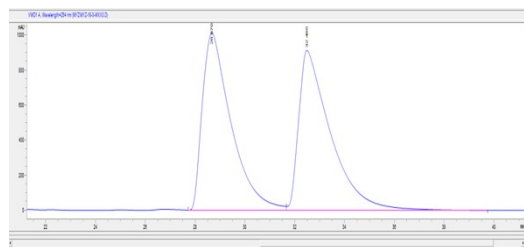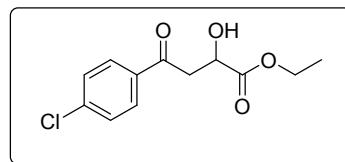

| # | Time   | Peak area | Peak height | Peak width | Symmetry factor | Peak area% |
|---|--------|-----------|-------------|------------|-----------------|------------|
| 1 | 31.338 | 5549      | 86.3        | 0.9581     | 0.595           | 53.769     |
| 2 | 34.585 | 4771      | 70.1        | 1.0145     | 0.569           | 46.231     |

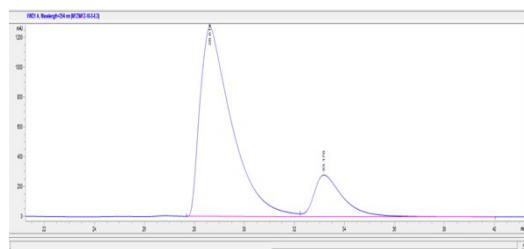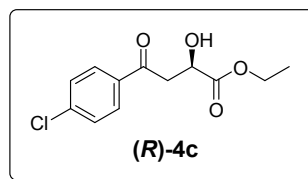

| # | Time   | Peak area | Peak height | Peak width | Symmetry factor | Peak area% |
|---|--------|-----------|-------------|------------|-----------------|------------|
| 1 | 31.41  | 6620.2    | 102.1       | 0.9703     | 0.574           | 83.369     |
| 2 | 34.772 | 1320.7    | 20.2        | 0.9871     | 0.648           | 16.631     |

#### 4-(4-Br-phenyl)-2-hydroxy-4-oxo-butyrac acid ethyl ester (**4d**) — —L<sub>1</sub>

53% yield, 75% ee determined by HPLC analysis (Chiralcel OD-H column, Hexane/*i*-PrOH=95/5, Flow rate: 1 mL/min, UV detection at 254 nm).

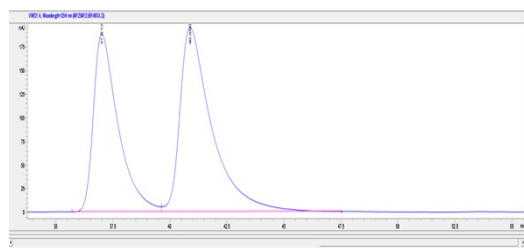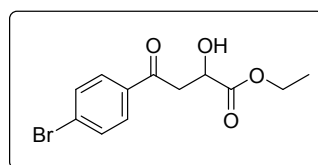

| # | Time   | Peak area | Peak height | Peak width | Symmetry factor | Peak area% |
|---|--------|-----------|-------------|------------|-----------------|------------|
| 1 | 37.012 | 16215.8   | 18808       | 1.1046     | 0.474           | 47.798     |
| 2 | 40.888 | 17000.3   | 190.5       | 1.4116     | 0.431           | 52.202     |

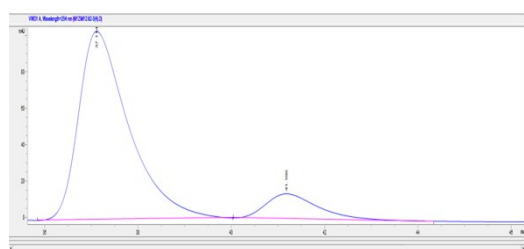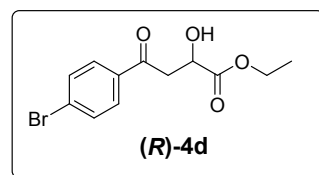

| # | Time   | Peak area | Peak height | Peak width | Symmetry factor | Peak area% |
|---|--------|-----------|-------------|------------|-----------------|------------|
| 1 | 37.114 | 7698.2    | 102.9       | 1.1047     | 0.531           | 87.897     |
| 2 | 41.186 | 1060      | 13.6        | 1.1441     | 0.619           | 12.103     |

#### 4-(4-OMe-phenyl)-2-hydroxy-4-oxo-butyrac acid ethyl ester (**4e**) — —L<sub>1</sub>

50% yield, 69% ee determined by HPLC analysis (Chiralcel AD-H column, Hexane/*i*-PrOH=95/5, Flow rate: 1 mL/min, UV detection at 254 nm).

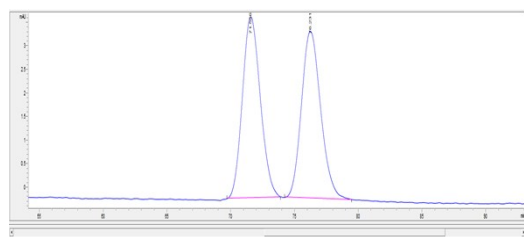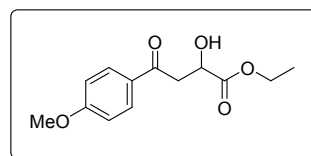

| # | Time   | Peak area | Peak height | Peak width | Symmetry factor | Peak area% |
|---|--------|-----------|-------------|------------|-----------------|------------|
| 1 | 71.556 | 375.8     | 3.8         | 1.1572     | 0.849           | 50.267     |
| 2 | 76.231 | 371.8     | 3.6         | 1.236      | 0.846           | 49.733     |

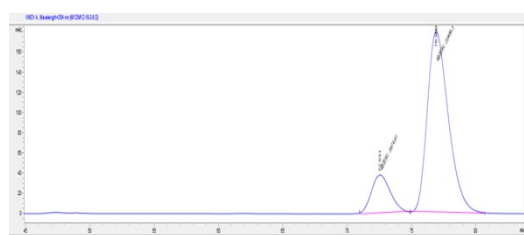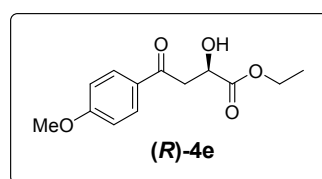

| # | Time   | Peak area | Peak height | Peak width | Symmetry factor | Peak area% |
|---|--------|-----------|-------------|------------|-----------------|------------|
| 1 | 72.531 | 3874.9    | 38          | 1.7005     | 0.834           | 15.917     |
| 2 | 76.9   | 20469.3   | 179.6       | 1.8993     | 0.702           | 84.083     |

#### 4-furyl-2-hydroxy-4-oxo-butyrac acid ethyl ester (4f) —L<sub>1</sub>

48% yield, 75% ee determined by HPLC analysis (Chiralcel OJ-H column, Hexane/i-PrOH=95/5, Flow rate: 1 mL/min, UV detection at 254 nm).

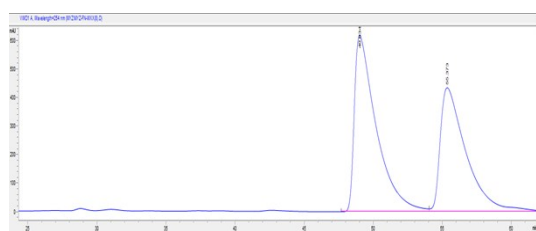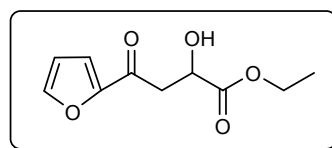

| # | Time   | Peak area | Peak height | Peak width | Symmetry factor | Peak area% |
|---|--------|-----------|-------------|------------|-----------------|------------|
| 1 | 49.034 | 68005.2   | 615.1       | 1.5849     | 0.297           | 54.691     |
| 2 | 55.373 | 56339     | 433.3       | 1.8509     | 0.345           | 45.309     |

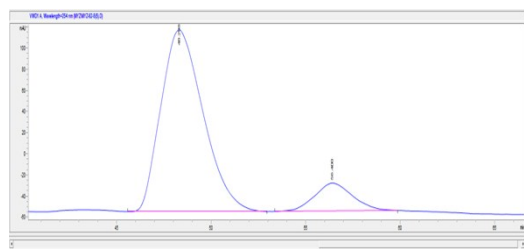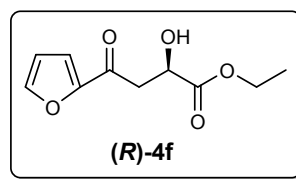

| # | Time   | Peak area | Peak height | Peak width | Symmetry factor | Peak area% |
|---|--------|-----------|-------------|------------|-----------------|------------|
| 1 | 48.298 | 26841     | 172.8       | 2.2983     | 0.725           | 87.815     |
| 2 | 56.4   | 3724.4    | 26.5        | 1.9414     | 0.863           | 12.185     |

#### 4- thienyl -2-hydroxy-4-oxo-butyrac acid ethyl ester (4g) —L<sub>1</sub>

45% yield, 87% ee determined by HPLC analysis (Chiralcel OJ-H column, Hexane/i-PrOH=95/5, Flow rate: 1 mL/min, UV detection at 254 nm).

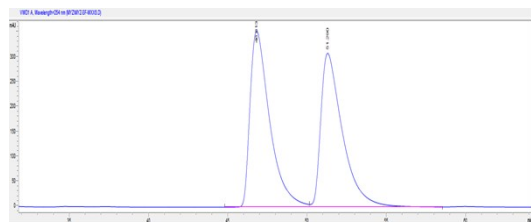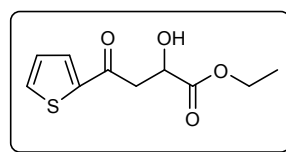

| # | Time   | Peak area | Peak height | Peak width | Symmetry factor | Peak area% |
|---|--------|-----------|-------------|------------|-----------------|------------|
| 1 | 46.813 | 30557.2   | 354.4       | 1.3079     | 0.468           | 51.012     |
| 2 | 51.29  | 29344.4   | 309.6       | 1.4038     | 0.429           | 48.988     |

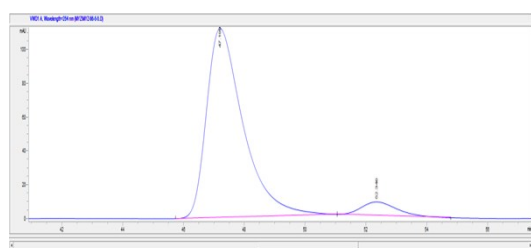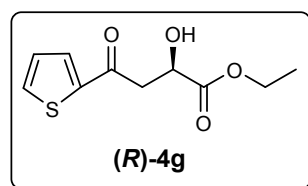

| # | Time   | Peak area | Peak height | Peak width | Symmetry factor | Peak area% |
|---|--------|-----------|-------------|------------|-----------------|------------|
| 1 | 47.199 | 9358.3    | 111.7       | 1.2536     | 0.548           | 93.505     |
| 2 | 52.346 | 650       | 8           | 1.1669     | 0.717           | 6.495      |

## 6. Single crystal diffraction of (*R*)-4b and (*R*)-4e

### (1) Single crystal diffraction of 4b

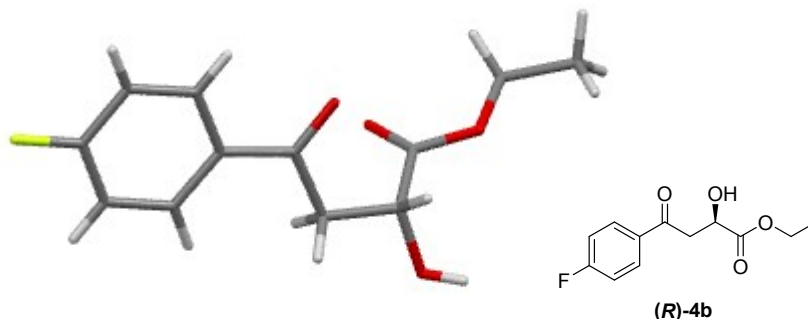

Table 1. Crystal data and structure refinement for xb8331\_0m.

|                                   |                                                                                                                       |
|-----------------------------------|-----------------------------------------------------------------------------------------------------------------------|
| Identification code               | xb8331_0m                                                                                                             |
| Empirical formula                 | C <sub>12</sub> H <sub>13</sub> F O <sub>4</sub>                                                                      |
| Formula weight                    | 240.22                                                                                                                |
| Temperature                       | 296(2) K                                                                                                              |
| Wavelength                        | 0.71073 Å                                                                                                             |
| Crystal system, space group       | Monoclinic, P2(1)                                                                                                     |
| Unit cell dimensions              | a = 5.059(5) Å    alpha = 90 deg.<br>b = 10.704(12) Å    beta = 101.62(2) deg.<br>c = 11.363(12) Å    gamma = 90 deg. |
| Volume                            | 602.6(11) Å <sup>3</sup>                                                                                              |
| Z, Calculated density             | 2, 1.324 Mg/m <sup>3</sup>                                                                                            |
| Absorption coefficient            | 0.109 mm <sup>-1</sup>                                                                                                |
| F(000)                            | 252                                                                                                                   |
| Crystal size                      | 0.31 x 0.23 x 0.12 mm                                                                                                 |
| Theta range for data collection   | 1.83 to 25.08 deg.                                                                                                    |
| Limiting indices                  | -6 ≤ h ≤ 5, -12 ≤ k ≤ 12, -13 ≤ l ≤ 8                                                                                 |
| Reflections collected / unique    | 2945 / 2093 [R(int) = 0.0512]                                                                                         |
| Completeness to theta = 25.08     | 99.2 %                                                                                                                |
| Absorption correction             | None                                                                                                                  |
| Max. and min. transmission        | 0.9865 and 0.9674                                                                                                     |
| Refinement method                 | Full-matrix least-squares on F <sup>2</sup>                                                                           |
| Data / restraints / parameters    | 2093 / 1 / 157                                                                                                        |
| Goodness-of-fit on F <sup>2</sup> | 1.064                                                                                                                 |
| Final R indices [I > 2σ(I)]       | R1 = 0.0777, wR2 = 0.1627                                                                                             |

R indices (all data)      R1 = 0.1518, wR2 = 0.1941  
 Absolute structure parameter    0(3)  
 Extinction coefficient      0.036(9)  
 Largest diff. peak and hole    0.205 and -0.224 e.A<sup>-3</sup>

Table 2. Atomic coordinates ( x 10<sup>4</sup>) and equivalent isotropic displacement parameters (A<sup>2</sup> x 10<sup>3</sup>) for xb8331\_0m. U(eq) is defined as one third of the trace of the orthogonalized Uij tensor.

|       | x         | y         | z        | U(eq)  |
|-------|-----------|-----------|----------|--------|
| F(1)  | 3210(9)   | 7545(5)   | 13469(4) | 94(2)  |
| O(1)  | 8529(10)  | 9672(5)   | 9354(5)  | 74(2)  |
| O(2)  | 13191(9)  | 7139(4)   | 7944(4)  | 59(1)  |
| O(3)  | 7179(10)  | 8086(6)   | 6865(4)  | 78(2)  |
| O(4)  | 10569(8)  | 9223(4)   | 6455(4)  | 61(1)  |
| C(1)  | 7262(14)  | 7087(6)   | 11221(6) | 57(2)  |
| C(2)  | 5922(14)  | 6851(7)   | 12142(6) | 61(2)  |
| C(3)  | 4501(16)  | 7770(8)   | 12558(6) | 68(2)  |
| C(4)  | 4479(16)  | 8989(7)   | 12129(7) | 70(2)  |
| C(5)  | 5812(13)  | 9240(7)   | 11218(6) | 52(2)  |
| C(6)  | 7258(12)  | 8294(6)   | 10755(5) | 46(2)  |
| C(7)  | 8602(13)  | 8612(6)   | 9757(6)  | 48(2)  |
| C(8)  | 10246(12) | 7610(6)   | 9244(6)  | 47(2)  |
| C(9)  | 11518(12) | 8114(6)   | 8254(5)  | 45(2)  |
| C(10) | 9492(15)  | 8481(6)   | 7132(6)  | 52(2)  |
| C(11) | 8891(17)  | 9574(10)  | 5287(7)  | 92(3)  |
| C(12) | 10490(20) | 10447(11) | 4691(7)  | 114(4) |

Table 3. Bond lengths [Å] and angles [deg] for xb8331\_0m.

|            |          |
|------------|----------|
| F(1)-C(3)  | 1.352(8) |
| O(1)-C(7)  | 1.221(7) |
| O(2)-C(9)  | 1.431(7) |
| O(2)-H(2)  | 0.8200   |
| O(3)-C(10) | 1.223(8) |
| O(4)-C(10) | 1.300(7) |
| O(4)-C(11) | 1.473(8) |



|                  |           |
|------------------|-----------|
| C(1)-C(2)        | 1.379(9)  |
| C(1)-C(6)        | 1.396(9)  |
| C(1)-H(1)        | 0.9300    |
| C(2)-C(3)        | 1.358(10) |
| C(2)-H(2A)       | 0.9300    |
| C(3)-C(4)        | 1.392(10) |
| C(4)-C(5)        | 1.371(9)  |
| C(4)-H(4)        | 0.9300    |
| C(5)-C(6)        | 1.411(9)  |
| C(5)-H(5)        | 0.9300    |
| C(6)-C(7)        | 1.475(9)  |
| C(7)-C(8)        | 1.542(8)  |
| C(8)-C(9)        | 1.505(8)  |
| C(8)-H(8A)       | 0.9700    |
| C(8)-H(8B)       | 0.9700    |
| C(9)-C(10)       | 1.517(8)  |
| C(9)-H(9)        | 0.9800    |
| C(11)-C(12)      | 1.485(11) |
| C(11)-H(11A)     | 0.9700    |
| C(11)-H(11B)     | 0.9700    |
| C(12)-H(12A)     | 0.9600    |
| C(12)-H(12B)     | 0.9600    |
| C(12)-H(12C)     | 0.9600    |
| C(9)-O(2)-H(2)   | 109.5     |
| C(10)-O(4)-C(11) | 117.1(6)  |
| C(2)-C(1)-C(6)   | 119.6(7)  |
| C(2)-C(1)-H(1)   | 120.2     |
| C(6)-C(1)-H(1)   | 120.2     |
| C(3)-C(2)-C(1)   | 120.5(7)  |
| C(3)-C(2)-H(2A)  | 119.8     |
| C(1)-C(2)-H(2A)  | 119.8     |
| F(1)-C(3)-C(2)   | 120.6(7)  |
| F(1)-C(3)-C(4)   | 117.6(7)  |
| C(2)-C(3)-C(4)   | 121.6(7)  |
| C(5)-C(4)-C(3)   | 118.5(7)  |
| C(5)-C(4)-H(4)   | 120.8     |
| C(3)-C(4)-H(4)   | 120.8     |
| C(4)-C(5)-C(6)   | 120.8(7)  |
| C(4)-C(5)-H(5)   | 119.6     |
| C(6)-C(5)-H(5)   | 119.6     |
| C(1)-C(6)-C(5)   | 118.9(6)  |

|                     |          |
|---------------------|----------|
| C(1)-C(6)-C(7)      | 122.7(6) |
| C(5)-C(6)-C(7)      | 118.4(6) |
| O(1)-C(7)-C(6)      | 121.3(6) |
| O(1)-C(7)-C(8)      | 118.9(6) |
| C(6)-C(7)-C(8)      | 119.8(6) |
| C(9)-C(8)-C(7)      | 112.2(5) |
| C(9)-C(8)-H(8A)     | 109.2    |
| C(7)-C(8)-H(8A)     | 109.2    |
| C(9)-C(8)-H(8B)     | 109.2    |
| C(7)-C(8)-H(8B)     | 109.2    |
| H(8A)-C(8)-H(8B)    | 107.9    |
| O(2)-C(9)-C(8)      | 106.6(5) |
| O(2)-C(9)-C(10)     | 108.3(5) |
| C(8)-C(9)-C(10)     | 113.8(5) |
| O(2)-C(9)-H(9)      | 109.3    |
| C(8)-C(9)-H(9)      | 109.3    |
| C(10)-C(9)-H(9)     | 109.3    |
| O(3)-C(10)-O(4)     | 124.0(6) |
| O(3)-C(10)-C(9)     | 124.7(6) |
| O(4)-C(10)-C(9)     | 111.3(6) |
| O(4)-C(11)-C(12)    | 107.7(6) |
| O(4)-C(11)-H(11A)   | 110.2    |
| C(12)-C(11)-H(11A)  | 110.2    |
| O(4)-C(11)-H(11B)   | 110.2    |
| C(12)-C(11)-H(11B)  | 110.2    |
| H(11A)-C(11)-H(11B) | 108.5    |
| C(11)-C(12)-H(12A)  | 109.5    |
| C(11)-C(12)-H(12B)  | 109.5    |
| H(12A)-C(12)-H(12B) | 109.5    |
| C(11)-C(12)-H(12C)  | 109.5    |
| H(12A)-C(12)-H(12C) | 109.5    |
| H(12B)-C(12)-H(12C) | 109.5    |

---

Symmetry transformations used to generate equivalent atoms:

Table 4. Anisotropic displacement parameters ( $\text{\AA}^2 \times 10^3$ ) for xb8331\_0m.

The anisotropic displacement factor exponent takes the form:

$$-2 \pi^2 [ h^2 a^{*2} U_{11} + \dots + 2 h k a^* b^* U_{12} ]$$

U11 U22 U33 U23 U13 U12

---

|       |        |        |       |       |       |        |
|-------|--------|--------|-------|-------|-------|--------|
| F(1)  | 109(4) | 115(4) | 73(3) | 4(3)  | 53(3) | -5(3)  |
| O(1)  | 80(4)  | 53(3)  | 93(4) | 19(3) | 25(3) | 9(3)   |
| O(2)  | 47(3)  | 50(3)  | 91(4) | 13(3) | 39(3) | 14(2)  |
| O(3)  | 42(3)  | 132(5) | 60(3) | 13(3) | 8(3)  | -23(3) |
| O(4)  | 50(3)  | 73(3)  | 59(3) | 22(3) | 10(2) | -8(3)  |
| C(1)  | 68(5)  | 48(5)  | 52(4) | 5(4)  | 9(4)  | 1(4)   |
| C(2)  | 66(5)  | 65(5)  | 53(5) | 15(4) | 15(4) | 1(4)   |
| C(3)  | 81(5)  | 78(6)  | 46(4) | 1(4)  | 15(4) | -3(5)  |
| C(4)  | 88(6)  | 51(5)  | 69(6) | -9(4) | 7(5)  | 3(5)   |
| C(5)  | 58(4)  | 48(4)  | 56(5) | -1(4) | 25(4) | 1(4)   |
| C(6)  | 40(4)  | 46(4)  | 49(4) | 0(3)  | 5(3)  | 3(3)   |
| C(7)  | 42(4)  | 41(4)  | 57(4) | 1(4)  | 2(3)  | 2(3)   |
| C(8)  | 38(4)  | 50(4)  | 56(4) | 2(3)  | 14(3) | 2(3)   |
| C(9)  | 40(4)  | 36(4)  | 55(4) | 8(3)  | 2(3)  | -1(3)  |
| C(10) | 50(4)  | 45(4)  | 60(5) | 14(4) | 8(4)  | 2(4)   |
| C(11) | 81(6)  | 125(8) | 61(5) | 32(5) | -6(5) | -20(6) |
| C(12) | 121(8) | 143(9) | 66(7) | 39(6) | -6(6) | -16(7) |

---

Table 5. Hydrogen coordinates ( $\times 10^4$ ) and isotropic displacement parameters ( $\text{\AA}^2 \times 10^3$ ) for xb8331\_0m.

---

|        | x     | y     | z     | U(eq) |
|--------|-------|-------|-------|-------|
| H(2)   | 14510 | 7447  | 7737  | 88    |
| H(1)   | 8162  | 6446  | 10913 | 68    |
| H(2A)  | 5992  | 6058  | 12480 | 73    |
| H(4)   | 3580  | 9619  | 12453 | 85    |
| H(5)   | 5763  | 10043 | 10902 | 62    |
| H(8A)  | 11649 | 7293  | 9885  | 57    |
| H(8B)  | 9068  | 6918  | 8937  | 57    |
| H(9)   | 12640 | 8838  | 8551  | 53    |
| H(11A) | 7244  | 9976  | 5404  | 110   |
| H(11B) | 8410  | 8837  | 4794  | 110   |
| H(12A) | 9617  | 11248 | 4595  | 170   |
| H(12B) | 10617 | 10123 | 3917  | 170   |
| H(12C) | 12268 | 10535 | 5176  | 170   |

Table 6. Torsion angles [deg] for xb8331\_0m.

---

|                        |           |
|------------------------|-----------|
| C(6)-C(1)-C(2)-C(3)    | 3.0(10)   |
| C(1)-C(2)-C(3)-F(1)    | -179.3(6) |
| C(1)-C(2)-C(3)-C(4)    | -4.0(11)  |
| F(1)-C(3)-C(4)-C(5)    | 179.0(7)  |
| C(2)-C(3)-C(4)-C(5)    | 3.6(11)   |
| C(3)-C(4)-C(5)-C(6)    | -2.3(11)  |
| C(2)-C(1)-C(6)-C(5)    | -1.7(9)   |
| C(2)-C(1)-C(6)-C(7)    | -178.8(6) |
| C(4)-C(5)-C(6)-C(1)    | 1.4(10)   |
| C(4)-C(5)-C(6)-C(7)    | 178.6(6)  |
| C(1)-C(6)-C(7)-O(1)    | 178.8(7)  |
| C(5)-C(6)-C(7)-O(1)    | 1.7(10)   |
| C(1)-C(6)-C(7)-C(8)    | -4.1(9)   |
| C(5)-C(6)-C(7)-C(8)    | 178.8(6)  |
| O(1)-C(7)-C(8)-C(9)    | -1.4(8)   |
| C(6)-C(7)-C(8)-C(9)    | -178.6(5) |
| C(7)-C(8)-C(9)-O(2)    | 174.2(5)  |
| C(7)-C(8)-C(9)-C(10)   | -66.4(7)  |
| C(11)-O(4)-C(10)-O(3)  | -1.6(10)  |
| C(11)-O(4)-C(10)-C(9)  | 175.2(6)  |
| O(2)-C(9)-C(10)-O(3)   | 96.7(8)   |
| C(8)-C(9)-C(10)-O(3)   | -21.6(9)  |
| O(2)-C(9)-C(10)-O(4)   | -80.0(6)  |
| C(8)-C(9)-C(10)-O(4)   | 161.6(6)  |
| C(10)-O(4)-C(11)-C(12) | 178.4(7)  |

---

Symmetry transformations used to generate equivalent atoms:

Table 7. Hydrogen bonds for xb8331\_0m [Å and deg.].

---

| D-H...A | d(D-H) | d(H...A) | d(D...A) | <(DHA) |
|---------|--------|----------|----------|--------|
|---------|--------|----------|----------|--------|

## ( 2 ) Single crystal diffraction of (R)-4e

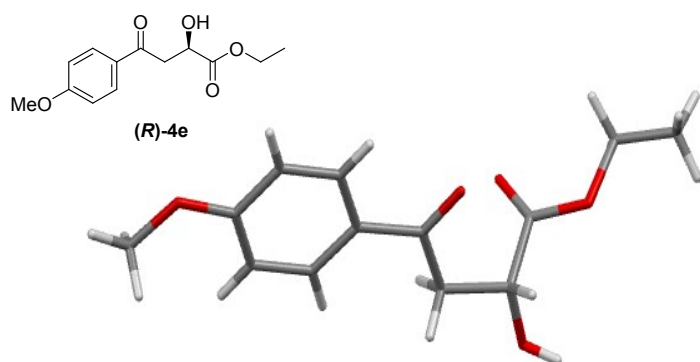

Table 1. Crystal data and structure refinement for xb8523\_0m.

|                             |                                                                                                                       |
|-----------------------------|-----------------------------------------------------------------------------------------------------------------------|
| Identification code         | xb8523_0m                                                                                                             |
| Empirical formula           | C <sub>13</sub> H <sub>16</sub> O <sub>5</sub>                                                                        |
| Formula weight              | 252.26                                                                                                                |
| Temperature                 | 296(2) K                                                                                                              |
| Wavelength                  | 0.71073 Å                                                                                                             |
| Crystal system, space group | Monoclinic, P2(1)                                                                                                     |
| Unit cell dimensions        | a = 5.0181(11) Å    alpha = 90 deg.<br>b = 11.253(2) Å    beta = 90.618(4) deg.<br>c = 22.901(5) Å    gamma = 90 deg. |
| Volume                      | 1293.1(5) Å <sup>3</sup>                                                                                              |
| Z, Calculated density       | 4, 1.296 Mg/m <sup>3</sup>                                                                                            |

Absorption coefficient 0.100 mm<sup>-1</sup>

F(000) 536

Crystal size 0.37 x 0.25 x 0.14 mm

Theta range for data collection 0.89 to 25.10 deg.

Limiting indices -5<=h<=5, -13<=k<=12, -25<=l<=27

Reflections collected / unique 6419 / 4112 [R(int) = 0.0225]

Completeness to theta = 25.10 99.8 %

Absorption correction None

Max. and min. transmission 0.9860 and 0.9643

Refinement method Full-matrix least-squares on F<sup>2</sup>

Data / restraints / parameters 4112 / 1 / 331

Goodness-of-fit on F<sup>2</sup> 1.035

Final R indices [I>2sigma(I)] R1 = 0.0538, wR2 = 0.1144

R indices (all data) R1 = 0.0868, wR2 = 0.1303

Absolute structure parameter 0.9(14)

Extinction coefficient 0.0127(16)

Largest diff. peak and hole 0.175 and -0.183 e.A<sup>-3</sup>

Table 2. Atomic coordinates ( x 10<sup>4</sup>) and equivalent isotropic displacement parameters (A<sup>2</sup> x 10<sup>3</sup>) for xb8523\_0m. U(eq) is defined as one third of the trace of the orthogonalized Uij tensor.

---

| x | y | z | U(eq) |
|---|---|---|-------|
|---|---|---|-------|

---

|       |           |         |          |        |
|-------|-----------|---------|----------|--------|
| O(1)  | 6972(6)   | 6430(3) | 11332(1) | 84(1)  |
| O(2)  | -194(5)   | 4730(2) | 9226(1)  | 80(1)  |
| O(3)  | -5432(5)  | 7218(3) | 8586(1)  | 82(1)  |
| O(4)  | -3452(5)  | 5140(3) | 7878(1)  | 80(1)  |
| O(5)  | -55(5)    | 6326(3) | 8073(1)  | 87(1)  |
| O(6)  | 12397(6)  | 6254(2) | 6411(1)  | 79(1)  |
| O(7)  | 5117(6)   | 4451(2) | 4341(1)  | 79(1)  |
| O(8)  | -218(5)   | 6898(3) | 3712(1)  | 80(1)  |
| O(9)  | 1665(5)   | 4901(3) | 2973(1)  | 109(1) |
| O(10) | 5200(5)   | 6002(3) | 3174(1)  | 84(1)  |
| C(1)  | 7251(10)  | 7545(4) | 11623(2) | 102(2) |
| C(2)  | 5217(7)   | 6348(3) | 10886(2) | 62(1)  |
| C(3)  | 3612(7)   | 7248(3) | 10684(2) | 62(1)  |
| C(4)  | 1877(7)   | 7045(3) | 10222(2) | 58(1)  |
| C(5)  | 1704(6)   | 5952(3) | 9953(1)  | 52(1)  |
| C(6)  | 3353(7)   | 5043(3) | 10163(2) | 65(1)  |
| C(7)  | 5077(8)   | 5231(4) | 10618(2) | 68(1)  |
| C(8)  | -130(7)   | 5702(3) | 9458(2)  | 57(1)  |
| C(9)  | -1954(7)  | 6684(3) | 9233(2)  | 59(1)  |
| C(10) | -3731(7)  | 6256(3) | 8737(2)  | 59(1)  |
| C(11) | -2156(7)  | 5912(4) | 8208(2)  | 64(1)  |
| C(12) | -2225(10) | 4806(6) | 7327(2)  | 109(2) |
| C(13) | -3813(13) | 3976(5) | 7032(2)  | 137(2) |
| C(14) | 12651(10) | 7386(4) | 6686(2)  | 95(2)  |
| C(15) | 10603(7)  | 6141(4) | 5966(2)  | 60(1)  |
| C(16) | 8978(7)   | 7041(3) | 5765(2)  | 60(1)  |
| C(17) | 7206(7)   | 6812(3) | 5311(2)  | 58(1)  |
| C(18) | 7023(7)   | 5697(3) | 5054(1)  | 52(1)  |
| C(19) | 8693(7)   | 4808(3) | 5267(2)  | 62(1)  |
| C(20) | 10459(8)  | 5025(3) | 5717(2)  | 69(1)  |
| C(21) | 5166(7)   | 5436(3) | 4564(2)  | 58(1)  |
| C(22) | 3354(7)   | 6388(3) | 4338(2)  | 60(1)  |
| C(23) | 1556(7)   | 5964(3) | 3851(2)  | 63(1)  |
| C(24) | 3059(7)   | 5633(4) | 3310(2)  | 66(1)  |
| C(25) | 2743(10)  | 4611(8) | 2400(2)  | 161(3) |
| C(26) | 970(13)   | 4493(7) | 1995(2)  | 158(3) |

---

Table 3. Bond lengths [Å] and angles [deg] for xb8523\_0m.

---

|              |          |
|--------------|----------|
| O(1)-C(2)    | 1.345(4) |
| O(1)-C(1)    | 1.427(5) |
| O(2)-C(8)    | 1.217(4) |
| O(3)-C(10)   | 1.418(4) |
| O(3)-H(3)    | 0.8200   |
| O(4)-C(11)   | 1.318(4) |
| O(4)-C(12)   | 1.458(4) |
| O(5)-C(11)   | 1.196(4) |
| O(6)-C(15)   | 1.358(4) |
| O(6)-C(14)   | 1.425(5) |
| O(7)-C(21)   | 1.221(4) |
| O(8)-C(23)   | 1.412(4) |
| O(8)-H(8)    | 0.8200   |
| O(9)-C(24)   | 1.323(4) |
| O(9)-C(25)   | 1.463(5) |
| O(10)-C(24)  | 1.196(4) |
| C(1)-H(1A)   | 0.9600   |
| C(1)-H(1B)   | 0.9600   |
| C(1)-H(1C)   | 0.9600   |
| C(2)-C(3)    | 1.370(5) |
| C(2)-C(7)    | 1.400(5) |
| C(3)-C(4)    | 1.382(5) |
| C(3)-H(3A)   | 0.9300   |
| C(4)-C(5)    | 1.377(5) |
| C(4)-H(4)    | 0.9300   |
| C(5)-C(6)    | 1.398(5) |
| C(5)-C(8)    | 1.479(5) |
| C(6)-C(7)    | 1.364(5) |
| C(6)-H(6)    | 0.9300   |
| C(7)-H(7)    | 0.9300   |
| C(8)-C(9)    | 1.522(5) |
| C(9)-C(10)   | 1.515(4) |
| C(9)-H(9A)   | 0.9700   |
| C(9)-H(9B)   | 0.9700   |
| C(10)-C(11)  | 1.505(5) |
| C(10)-H(10)  | 0.9800   |
| C(12)-C(13)  | 1.397(7) |
| C(12)-H(12A) | 0.9700   |
| C(12)-H(12B) | 0.9700   |
| C(13)-H(13A) | 0.9600   |
| C(13)-H(13B) | 0.9600   |
| C(13)-H(13C) | 0.9600   |



|                  |          |
|------------------|----------|
| C(14)-H(14A)     | 0.9600   |
| C(14)-H(14B)     | 0.9600   |
| C(14)-H(14C)     | 0.9600   |
| C(15)-C(16)      | 1.377(5) |
| C(15)-C(20)      | 1.380(5) |
| C(16)-C(17)      | 1.385(5) |
| C(16)-H(16)      | 0.9300   |
| C(17)-C(18)      | 1.388(4) |
| C(17)-H(17)      | 0.9300   |
| C(18)-C(19)      | 1.389(5) |
| C(18)-C(21)      | 1.482(5) |
| C(19)-C(20)      | 1.375(5) |
| C(19)-H(19)      | 0.9300   |
| C(20)-H(20)      | 0.9300   |
| C(21)-C(22)      | 1.494(5) |
| C(22)-C(23)      | 1.504(4) |
| C(22)-H(22A)     | 0.9700   |
| C(22)-H(22B)     | 0.9700   |
| C(23)-C(24)      | 1.504(5) |
| C(23)-H(23)      | 0.9800   |
| C(25)-C(26)      | 1.284(7) |
| C(25)-H(25A)     | 0.9700   |
| C(25)-H(25B)     | 0.9700   |
| C(26)-H(26A)     | 0.9600   |
| C(26)-H(26B)     | 0.9600   |
| C(26)-H(26C)     | 0.9600   |
|                  |          |
| C(2)-O(1)-C(1)   | 118.4(3) |
| C(10)-O(3)-H(3)  | 109.5    |
| C(11)-O(4)-C(12) | 117.1(3) |
| C(15)-O(6)-C(14) | 118.1(3) |
| C(23)-O(8)-H(8)  | 109.5    |
| C(24)-O(9)-C(25) | 117.6(3) |
| O(1)-C(1)-H(1A)  | 109.5    |
| O(1)-C(1)-H(1B)  | 109.5    |
| H(1A)-C(1)-H(1B) | 109.5    |
| O(1)-C(1)-H(1C)  | 109.5    |
| H(1A)-C(1)-H(1C) | 109.5    |
| H(1B)-C(1)-H(1C) | 109.5    |
| O(1)-C(2)-C(3)   | 125.6(4) |
| O(1)-C(2)-C(7)   | 115.1(3) |
| C(3)-C(2)-C(7)   | 119.3(4) |

|                     |          |
|---------------------|----------|
| C(2)-C(3)-C(4)      | 119.9(4) |
| C(2)-C(3)-H(3A)     | 120.1    |
| C(4)-C(3)-H(3A)     | 120.1    |
| C(5)-C(4)-C(3)      | 121.8(3) |
| C(5)-C(4)-H(4)      | 119.1    |
| C(3)-C(4)-H(4)      | 119.1    |
| C(4)-C(5)-C(6)      | 117.7(3) |
| C(4)-C(5)-C(8)      | 123.2(3) |
| C(6)-C(5)-C(8)      | 119.0(3) |
| C(7)-C(6)-C(5)      | 121.1(4) |
| C(7)-C(6)-H(6)      | 119.4    |
| C(5)-C(6)-H(6)      | 119.4    |
| C(6)-C(7)-C(2)      | 120.2(4) |
| C(6)-C(7)-H(7)      | 119.9    |
| C(2)-C(7)-H(7)      | 119.9    |
| O(2)-C(8)-C(5)      | 121.3(4) |
| O(2)-C(8)-C(9)      | 119.4(3) |
| C(5)-C(8)-C(9)      | 119.3(3) |
| C(10)-C(9)-C(8)     | 111.7(3) |
| C(10)-C(9)-H(9A)    | 109.3    |
| C(8)-C(9)-H(9A)     | 109.3    |
| C(10)-C(9)-H(9B)    | 109.3    |
| C(8)-C(9)-H(9B)     | 109.3    |
| H(9A)-C(9)-H(9B)    | 107.9    |
| O(3)-C(10)-C(11)    | 108.7(3) |
| O(3)-C(10)-C(9)     | 106.7(3) |
| C(11)-C(10)-C(9)    | 112.1(3) |
| O(3)-C(10)-H(10)    | 109.8    |
| C(11)-C(10)-H(10)   | 109.8    |
| C(9)-C(10)-H(10)    | 109.8    |
| O(5)-C(11)-O(4)     | 122.7(4) |
| O(5)-C(11)-C(10)    | 125.4(4) |
| O(4)-C(11)-C(10)    | 111.8(3) |
| C(13)-C(12)-O(4)    | 110.2(4) |
| C(13)-C(12)-H(12A)  | 109.6    |
| O(4)-C(12)-H(12A)   | 109.6    |
| C(13)-C(12)-H(12B)  | 109.6    |
| O(4)-C(12)-H(12B)   | 109.6    |
| H(12A)-C(12)-H(12B) | 108.1    |
| C(12)-C(13)-H(13A)  | 109.5    |
| C(12)-C(13)-H(13B)  | 109.5    |
| H(13A)-C(13)-H(13B) | 109.5    |

|                     |          |
|---------------------|----------|
| C(12)-C(13)-H(13C)  | 109.5    |
| H(13A)-C(13)-H(13C) | 109.5    |
| H(13B)-C(13)-H(13C) | 109.5    |
| O(6)-C(14)-H(14A)   | 109.5    |
| O(6)-C(14)-H(14B)   | 109.5    |
| H(14A)-C(14)-H(14B) | 109.5    |
| O(6)-C(14)-H(14C)   | 109.5    |
| H(14A)-C(14)-H(14C) | 109.5    |
| H(14B)-C(14)-H(14C) | 109.5    |
| O(6)-C(15)-C(16)    | 124.5(4) |
| O(6)-C(15)-C(20)    | 115.2(4) |
| C(16)-C(15)-C(20)   | 120.2(4) |
| C(15)-C(16)-C(17)   | 119.1(3) |
| C(15)-C(16)-H(16)   | 120.4    |
| C(17)-C(16)-H(16)   | 120.4    |
| C(16)-C(17)-C(18)   | 121.7(3) |
| C(16)-C(17)-H(17)   | 119.2    |
| C(18)-C(17)-H(17)   | 119.2    |
| C(17)-C(18)-C(19)   | 117.8(3) |
| C(17)-C(18)-C(21)   | 122.6(3) |
| C(19)-C(18)-C(21)   | 119.6(3) |
| C(20)-C(19)-C(18)   | 121.1(3) |
| C(20)-C(19)-H(19)   | 119.5    |
| C(18)-C(19)-H(19)   | 119.5    |
| C(19)-C(20)-C(15)   | 120.1(4) |
| C(19)-C(20)-H(20)   | 120.0    |
| C(15)-C(20)-H(20)   | 120.0    |
| O(7)-C(21)-C(18)    | 120.4(4) |
| O(7)-C(21)-C(22)    | 119.8(4) |
| C(18)-C(21)-C(22)   | 119.8(3) |
| C(21)-C(22)-C(23)   | 112.8(3) |
| C(21)-C(22)-H(22A)  | 109.0    |
| C(23)-C(22)-H(22A)  | 109.0    |
| C(21)-C(22)-H(22B)  | 109.0    |
| C(23)-C(22)-H(22B)  | 109.0    |
| H(22A)-C(22)-H(22B) | 107.8    |
| O(8)-C(23)-C(22)    | 107.6(3) |
| O(8)-C(23)-C(24)    | 108.6(3) |
| C(22)-C(23)-C(24)   | 112.8(3) |
| O(8)-C(23)-H(23)    | 109.3    |
| C(22)-C(23)-H(23)   | 109.3    |
| C(24)-C(23)-H(23)   | 109.3    |

|                     |          |
|---------------------|----------|
| O(10)-C(24)-O(9)    | 122.4(4) |
| O(10)-C(24)-C(23)   | 126.0(4) |
| O(9)-C(24)-C(23)    | 111.6(3) |
| C(26)-C(25)-O(9)    | 114.2(5) |
| C(26)-C(25)-H(25A)  | 108.7    |
| O(9)-C(25)-H(25A)   | 108.7    |
| C(26)-C(25)-H(25B)  | 108.7    |
| O(9)-C(25)-H(25B)   | 108.7    |
| H(25A)-C(25)-H(25B) | 107.6    |
| C(25)-C(26)-H(26A)  | 109.5    |
| C(25)-C(26)-H(26B)  | 109.5    |
| H(26A)-C(26)-H(26B) | 109.5    |
| C(25)-C(26)-H(26C)  | 109.5    |
| H(26A)-C(26)-H(26C) | 109.5    |
| H(26B)-C(26)-H(26C) | 109.5    |

---

Symmetry transformations used to generate equivalent atoms:

Table 4. Anisotropic displacement parameters ( $\text{\AA}^2 \times 10^3$ ) for xb8523\_0m.

The anisotropic displacement factor exponent takes the form:

$$-2 \pi^2 [ h^2 a^{*2} U_{11} + \dots + 2 h k a^* b^* U_{12} ]$$

---

|       | U11    | U22    | U33    | U23    | U13    | U12    |
|-------|--------|--------|--------|--------|--------|--------|
| O(1)  | 100(2) | 78(2)  | 73(2)  | 2(2)   | -22(2) | 9(2)   |
| O(2)  | 88(2)  | 56(2)  | 96(2)  | -21(2) | -5(2)  | -2(2)  |
| O(3)  | 53(2)  | 83(2)  | 110(2) | -14(2) | -11(2) | 4(1)   |
| O(4)  | 66(2)  | 102(2) | 73(2)  | -25(2) | 17(1)  | -20(2) |
| O(5)  | 57(2)  | 125(3) | 79(2)  | -8(2)  | 11(1)  | -32(2) |
| O(6)  | 95(2)  | 76(2)  | 66(2)  | 0(2)   | -8(2)  | -3(2)  |
| O(7)  | 93(2)  | 53(2)  | 93(2)  | -25(2) | -1(2)  | -3(1)  |
| O(8)  | 55(2)  | 79(2)  | 106(2) | -20(2) | -5(2)  | -3(2)  |
| O(9)  | 62(2)  | 163(3) | 102(2) | -70(2) | 20(2)  | -33(2) |
| O(10) | 56(2)  | 117(3) | 79(2)  | -10(2) | 13(1)  | -25(2) |
| C(1)  | 126(4) | 104(4) | 76(3)  | -12(3) | -26(3) | -2(3)  |
| C(2)  | 63(2)  | 65(3)  | 57(2)  | 3(2)   | 5(2)   | 1(2)   |
| C(3)  | 68(2)  | 58(2)  | 61(2)  | -7(2)  | 1(2)   | 1(2)   |
| C(4)  | 61(2)  | 50(2)  | 61(2)  | 1(2)   | 2(2)   | 8(2)   |
| C(5)  | 53(2)  | 44(2)  | 58(2)  | 3(2)   | 14(2)  | -3(2)  |

|       |        |        |        |         |        |        |
|-------|--------|--------|--------|---------|--------|--------|
| C(6)  | 75(3)  | 45(2)  | 75(3)  | 2(2)    | 15(2)  | 3(2)   |
| C(7)  | 76(3)  | 59(3)  | 69(3)  | 11(2)   | -2(2)  | 8(2)   |
| C(8)  | 54(2)  | 55(3)  | 63(2)  | -7(2)   | 12(2)  | -7(2)  |
| C(9)  | 50(2)  | 62(3)  | 64(2)  | -5(2)   | 8(2)   | -3(2)  |
| C(10) | 43(2)  | 65(3)  | 69(2)  | -9(2)   | 4(2)   | -8(2)  |
| C(11) | 48(2)  | 74(3)  | 69(2)  | -1(2)   | 1(2)   | -10(2) |
| C(12) | 101(4) | 154(5) | 73(3)  | -36(3)  | 33(3)  | -29(4) |
| C(13) | 177(6) | 133(5) | 102(4) | -42(4)  | 42(4)  | -33(5) |
| C(14) | 127(4) | 87(3)  | 71(3)  | -13(3)  | -16(3) | -15(3) |
| C(15) | 63(2)  | 63(3)  | 53(2)  | 1(2)    | 8(2)   | -6(2)  |
| C(16) | 70(2)  | 49(2)  | 61(2)  | -4(2)   | 5(2)   | -2(2)  |
| C(17) | 61(2)  | 45(2)  | 67(2)  | -9(2)   | 8(2)   | 2(2)   |
| C(18) | 57(2)  | 47(2)  | 53(2)  | -1(2)   | 13(2)  | -2(2)  |
| C(19) | 75(3)  | 42(2)  | 70(3)  | -4(2)   | 17(2)  | -4(2)  |
| C(20) | 81(3)  | 51(3)  | 74(3)  | 3(2)    | 3(2)   | 6(2)   |
| C(21) | 59(2)  | 49(2)  | 68(2)  | -8(2)   | 22(2)  | -9(2)  |
| C(22) | 56(2)  | 52(2)  | 72(2)  | -13(2)  | 7(2)   | -8(2)  |
| C(23) | 51(2)  | 59(2)  | 78(2)  | -15(2)  | 11(2)  | -12(2) |
| C(24) | 47(2)  | 78(3)  | 72(2)  | -12(2)  | 2(2)   | -7(2)  |
| C(25) | 72(4)  | 303(9) | 107(4) | -109(6) | 14(3)  | -15(5) |
| C(26) | 149(6) | 240(9) | 84(4)  | 25(5)   | 4(4)   | 59(6)  |

Table 5. Hydrogen coordinates ( $\times 10^4$ ) and isotropic displacement parameters ( $\text{\AA}^2 \times 10^3$ ) for xb8523\_0m.

|       | x     | y    | z     | U(eq) |
|-------|-------|------|-------|-------|
| H(3)  | -6863 | 6959 | 8466  | 123   |
| H(8)  | -1453 | 6640 | 3512  | 120   |
| H(1A) | 7904  | 8128 | 11354 | 154   |
| H(1B) | 8486  | 7465 | 11943 | 154   |
| H(1C) | 5550  | 7793 | 11767 | 154   |
| H(3A) | 3690  | 7994 | 10858 | 75    |
| H(4)  | 797   | 7662 | 10089 | 69    |
| H(6)  | 3274  | 4297 | 9989  | 78    |
| H(7)  | 6163  | 4616 | 10750 | 82    |
| H(9A) | -3055 | 6968 | 9550  | 71    |
| H(9B) | -881  | 7345 | 9099  | 71    |

|        |       |      |      |     |
|--------|-------|------|------|-----|
| H(10)  | -4798 | 5578 | 8867 | 71  |
| H(12A) | -2005 | 5506 | 7085 | 131 |
| H(12B) | -476  | 4469 | 7403 | 131 |
| H(13A) | -3723 | 3226 | 7232 | 205 |
| H(13B) | -3183 | 3881 | 6641 | 205 |
| H(13C) | -5626 | 4249 | 7022 | 205 |
| H(14A) | 13228 | 7962 | 6405 | 143 |
| H(14B) | 13936 | 7336 | 6998 | 143 |
| H(14C) | 10958 | 7621 | 6839 | 143 |
| H(16)  | 9068  | 7794 | 5932 | 72  |
| H(17)  | 6111  | 7421 | 5175 | 69  |
| H(19)  | 8614  | 4054 | 5101 | 75  |
| H(20)  | 11559 | 4419 | 5854 | 82  |
| H(22A) | 4420  | 7046 | 4198 | 72  |
| H(22B) | 2270  | 6679 | 4655 | 72  |
| H(23)  | 537   | 5275 | 3985 | 75  |
| H(25A) | 3974  | 5232 | 2287 | 193 |
| H(25B) | 3746  | 3876 | 2431 | 193 |
| H(26A) | 1824  | 4314 | 1633 | 237 |
| H(26B) | -20   | 5219 | 1956 | 237 |
| H(26C) | -220  | 3858 | 2095 | 237 |

Table 6. Torsion angles [deg] for xb8523\_0m.

|                     |           |
|---------------------|-----------|
| C(1)-O(1)-C(2)-C(3) | -0.9(6)   |
| C(1)-O(1)-C(2)-C(7) | 179.3(4)  |
| O(1)-C(2)-C(3)-C(4) | -179.7(3) |
| C(7)-C(2)-C(3)-C(4) | 0.1(5)    |
| C(2)-C(3)-C(4)-C(5) | 0.0(5)    |
| C(3)-C(4)-C(5)-C(6) | 0.0(5)    |
| C(3)-C(4)-C(5)-C(8) | 179.9(3)  |
| C(4)-C(5)-C(6)-C(7) | -0.1(5)   |
| C(8)-C(5)-C(6)-C(7) | 180.0(3)  |
| C(5)-C(6)-C(7)-C(2) | 0.2(5)    |
| O(1)-C(2)-C(7)-C(6) | 179.6(3)  |
| C(3)-C(2)-C(7)-C(6) | -0.2(6)   |
| C(4)-C(5)-C(8)-O(2) | 178.7(3)  |
| C(6)-C(5)-C(8)-O(2) | -1.3(5)   |
| C(4)-C(5)-C(8)-C(9) | -0.7(5)   |
| C(6)-C(5)-C(8)-C(9) | 179.3(3)  |

|                         |           |
|-------------------------|-----------|
| O(2)-C(8)-C(9)-C(10)    | 2.0(4)    |
| C(5)-C(8)-C(9)-C(10)    | -178.6(3) |
| C(8)-C(9)-C(10)-O(3)    | 176.8(3)  |
| C(8)-C(9)-C(10)-C(11)   | -64.4(4)  |
| C(12)-O(4)-C(11)-O(5)   | -0.6(6)   |
| C(12)-O(4)-C(11)-C(10)  | 175.4(4)  |
| O(3)-C(10)-C(11)-O(5)   | 88.8(4)   |
| C(9)-C(10)-C(11)-O(5)   | -28.8(5)  |
| O(3)-C(10)-C(11)-O(4)   | -86.9(4)  |
| C(9)-C(10)-C(11)-O(4)   | 155.4(3)  |
| C(11)-O(4)-C(12)-C(13)  | 179.3(5)  |
| C(14)-O(6)-C(15)-C(16)  | -0.9(5)   |
| C(14)-O(6)-C(15)-C(20)  | 179.8(4)  |
| O(6)-C(15)-C(16)-C(17)  | -179.4(3) |
| C(20)-C(15)-C(16)-C(17) | -0.1(5)   |
| C(15)-C(16)-C(17)-C(18) | 0.1(5)    |
| C(16)-C(17)-C(18)-C(19) | -0.2(5)   |
| C(16)-C(17)-C(18)-C(21) | -179.2(3) |
| C(17)-C(18)-C(19)-C(20) | 0.2(5)    |
| C(21)-C(18)-C(19)-C(20) | 179.3(3)  |
| C(18)-C(19)-C(20)-C(15) | -0.2(6)   |
| O(6)-C(15)-C(20)-C(19)  | 179.4(3)  |
| C(16)-C(15)-C(20)-C(19) | 0.1(6)    |
| C(17)-C(18)-C(21)-O(7)  | 178.1(3)  |
| C(19)-C(18)-C(21)-O(7)  | -0.9(5)   |
| C(17)-C(18)-C(21)-C(22) | -1.4(5)   |
| C(19)-C(18)-C(21)-C(22) | 179.6(3)  |
| O(7)-C(21)-C(22)-C(23)  | 1.9(5)    |
| C(18)-C(21)-C(22)-C(23) | -178.5(3) |
| C(21)-C(22)-C(23)-O(8)  | 174.6(3)  |
| C(21)-C(22)-C(23)-C(24) | -65.6(4)  |
| C(25)-O(9)-C(24)-O(10)  | -4.2(7)   |
| C(25)-O(9)-C(24)-C(23)  | 173.1(5)  |
| O(8)-C(23)-C(24)-O(10)  | 94.6(5)   |
| C(22)-C(23)-C(24)-O(10) | -24.6(6)  |
| O(8)-C(23)-C(24)-O(9)   | -82.6(4)  |
| C(22)-C(23)-C(24)-O(9)  | 158.2(3)  |
| C(24)-O(9)-C(25)-C(26)  | -143.8(7) |

---

Symmetry transformations used to generate equivalent atoms:

Table 7. Hydrogen bonds for xb8523\_0m [Å and deg.].

---

| D-H...A | d(D-H) | d(H...A) | d(D...A) | <(DHA) |
|---------|--------|----------|----------|--------|
|---------|--------|----------|----------|--------|
